# Supplementary material for: Self-driven dual hydrogen production system based on a bifunctional single-atomic Rh catalyst
Source: Royal Society of Chemistry journal article supplement (doi:10.1039/d1ta07375c), 2021-11-06
Supplement: d1ta07375c1.pdf [file d1ta07375c1.pdf]

## Electronic Supplementary Information for

### Self-driven dual hydrogen production system based on bifunctional single-atomic Rh catalyst

Xianyun Peng<sup>1,2</sup>, Yuying Mi<sup>2</sup>, Xijun Liu<sup>1,2\*</sup>, Jiaqiang Sun<sup>3</sup>, Yuan Qiu<sup>2</sup>, Shusheng Zhang<sup>4</sup>, Xiaoxing Ke<sup>5</sup>,

Xinzhong Wang<sup>1\*</sup>, and Jun Luo<sup>2\*</sup>

<sup>1</sup> Information Technology Research Institute, Shenzhen Institute of Information Technology, Shenzhen 518172, China.

<sup>2</sup> School of Materials Science and Engineering, Tianjin Key Lab of Photoelectric Materials & Devices, Tianjin University of Technology, Tianjin 300384, China.

<sup>3</sup> State Key Laboratory of Coal Conversion, Institute of Coal Chemistry, Chinese Academy of Sciences, Taiyuan 030001, China.

<sup>4</sup> College of Chemistry, Zhengzhou University, Zhengzhou 450000, China.

<sup>5</sup> Beijing Key Laboratory of Microstructure and Properties of Solids, Faculty of Materials and Manufacturing, Beijing University of Technology, Beijing 100124, China.

\* e-mail: xjliu@tjut.edu.cn (X.J.L.), wangxz@szit.com.cn (X.Z.W.), jluo@email.tjut.edu.cn (J.L.)

## Experimental Section

### Synthesis of Rh-SA/Ti<sub>3</sub>C<sub>2</sub>O<sub>x</sub>

To synthesize the Rh-SA/Ti<sub>3</sub>C<sub>2</sub>O<sub>x</sub>, 1 g of lithium fluoride (LiF) powder was added to 10 mL of 9 M HCl solution. The mixture was stirred for 5 min with a magnetic Teflon stir bar to dissolve the salt. 1 g of Ti<sub>3</sub>AlC<sub>2</sub> powder was slowly and carefully added to the above mixture over 0.5 h to avoid initial overheating of the solution as a result of the exothermic nature of the reactions. Subsequently, 1 mL of 1 mg mL<sup>-1</sup> freshly prepared rhodium chloride hydrate (RhCl<sub>3</sub>·xH<sub>2</sub>O) solution was added to the solution. The reaction mixture was held at 35 °C in a water bath for 24 h, after which the mixture was washed with deionized water several times by centrifugation until the pH of the supernatant reached approximately 6. The collected sediments from the last centrifugation were dispersed in 50 mL deionized water. The mixture was vigorously ultrasonicated for 1 h under a flowing Ar atmosphere in an ice bath to minimize oxidation. After that, the solution was centrifuged at 3500 rpm for 1 h and the dark-green supernatant was collected. Thereafter, the colloidal suspension (50 mL) was mixed with 50 mL KOH solutions (10 wt%) in the presence of Ar atmosphere for 4 h at room temperature. Then, the alkalization mixture was obtained by washing with deionized water by centrifugation and freeze-drying. Finally, the Rh-SA/Ti<sub>3</sub>C<sub>2</sub>O<sub>x</sub> was obtained by annealing the freeze-dried product at 350 °C for 5 h at a heating rate of 5 °C min<sup>-1</sup> in a tube furnace under an Ar atmosphere (50 sccm).

### Synthesis of Ti<sub>3</sub>C<sub>2</sub>O<sub>x</sub>

The Ti<sub>3</sub>C<sub>2</sub>O<sub>x</sub> was prepared using a similar procedure to the one described above for Rh-SA/Ti<sub>3</sub>C<sub>2</sub>O<sub>x</sub>, except that no Rh precursor was added.

### Synthesis of Rh-NP/Ti<sub>3</sub>C<sub>2</sub>O<sub>x</sub>

For the synthesis of Rh-NP/Ti<sub>3</sub>C<sub>2</sub>O<sub>x</sub>, 50 mg of Ti<sub>3</sub>C<sub>2</sub>O<sub>x</sub> was firstly dissolved in 50 mL of water in a round-bottom flask, then sonicated for 30 min to obtain a uniform dispersion. Then, 5 mL of 1 mg mL<sup>-1</sup> RhCl<sub>3</sub>·xH<sub>2</sub>O aqueous solution was added into the above Ti<sub>3</sub>C<sub>2</sub>O<sub>x</sub> solution gently, with electromagnetic stirring for 30 min. Then, 50 mg of sodium borohydride (NaBH<sub>4</sub>) dissolved in 1 mL of 2 M NaOH solution was quickly added

into the above resultant mixture under vigorous stirring 2 h and then ultrasonic treatment 2 h at 0 °C using an ice bath under a flowing Ar atmosphere. Subsequently, the resulting solution was washed with deionized water by centrifugation. Finally, the Rh-NP/Ti<sub>3</sub>C<sub>2</sub>O<sub>x</sub> composite was obtained by freeze-drying.

### **Materials Characterization**

X-ray diffraction (XRD) patterns of the samples were obtained by a Rigaku D/max 2500 X-ray diffractometer with a Cu K $\alpha$  radiation source ( $\lambda$  = 0.154598 nm). The morphology and structure of the samples were characterized by using transmission electron microscopy (TEM, Talos F200X) equipped with energy-dispersive X-ray spectroscopy (EDS). High-angle annular dark-field scanning transmission electron microscopy (HAADF-STEM) images were taken using an FEI Titan Cubed G2 microscope equipped with a probe corrector operated at 300 kV. Inductively coupled plasma atomic emission spectroscopy (ICP-OES) analysis was recorded on a Thermo iCAP RQ instrument. N<sub>2</sub> adsorption/desorption isotherms were measured on a Tristar II 3020 Micromeritics analyzer. Pore volumes and sizes were computed by a quenched solid DFT method, and specific surface areas were discerned by the Brunauer–Emmett–Teller (BET) method. Atomic force microscopy (AFM) images were collected in tapping mode under ambient atmosphere using a Bruker microscope (Dimension icon) and processed with NanoScope Analysis software.

### **X-ray absorption data collection, analysis, and modeling**

X-ray absorption fine structure spectroscopy (XAFS) measurements were carried out at the BL14W1 station in Shanghai Synchrotron Radiation Facility (SSRF, 3.5 GeV, 250 mA maximum, Si(311) double crystals). The Rh K-edge spectra of the Rh-SA/Ti<sub>3</sub>C<sub>2</sub>O<sub>x</sub> catalysts were collected in fluorescent mode using a seven-element Ge detector. Reference spectra were recorded in transmission mode using an ionization chamber. The raw data were then background-subtracted, normalized, and Fourier-transformed by the standard procedures with the ATHENA program. The least-squares curve fitting analysis was carried out using the ARTEMIS program. The data were fitted in *R*-space with theoretical models constructed on the basis of the crystal structure derived from XRD or DFT optimization.

## Electrode Preparations

The preparation of the working electrodes containing the investigated catalysts can be found as follows: the rotating disk electrode (RDE, 0.19625 cm<sup>2</sup>) was polished with alumina slurry and rinsed with distilled water before and after the catalyst was loaded on the disk. The catalyst ink was prepared by mixing 6 mg of catalyst powder, 0.5 ml of Nafion (0.05 wt.%) solution, and 0.5 ml of absolute ethyl alcohol. The mixed solution was sonicated for 1 h to form homogeneous catalytic ink. Finally, 20 µL of the catalyst ink was dropped on the glassy carbon electrode. After dried at ambient conditions, the catalyst with a content of 0.12 mg was loaded on the working electrode. As a comparison, commercial Pt/C (20 wt.%) catalyst ink was also prepared with the same method.

## Electrochemical Measurements

The electrochemical measurements were carried out on the CHI 760E workstation (CH Instruments, Inc.) with a Pine rotating disk electrode system (Pine Instruments Co. Ltd.). A typical three-electrode system was employed for all of the electrochemical measurements, using a glass carbon rotating disk electrode covered by catalyst as the working electrode. A graphite rod was used as the counter electrode. An Ag/AgCl electrode saturated with KCl solution was used as the reference electrode for HER, while Hg/HgO electrode was used for HzOR. For HER, 0.1 M H<sub>2</sub>SO<sub>4</sub>, 1 M PBS, and 0.1 M KOH solutions were chosen as electrolytes, while 0.1 M KOH + 0.1 M N<sub>2</sub>H<sub>4</sub> solution was used as the HzOR electrolyte. For HER and HzOR tests in the three-electrode system, the mass loading of the catalyst was controlled as 0.12 mg. Before all electrochemical measurements, the electrolyte was degassed for 30 min in advance with a high-purity Ar (99.999%), and a continuous flow of Ar was maintained throughout all the tests.

The recorded current density corresponds to the geometric surface area of the rotating disk electrode. All measured potentials were calibrated by 90% *iR*-compensation and adjusted to the reversible hydrogen electrode (RHE) according to the Nernst equation potential:

$$E \text{ (V vs RHE)} = E \text{ (V vs Ag/AgCl)} + 0.0591 \times \text{pH} + 0.197$$

$$E \text{ (V vs RHE)} = E \text{ (V vs Hg/HgO)} + 0.059 \times \text{pH} + 0.098$$

The hydrogen evolution reaction (HER) and hydrazine oxidation reaction (HzOR) activity were evaluated by using linear sweep voltammetry (LSV) with a sweep rate of 10 mV s<sup>-1</sup>. The scan rate was 50 mV s<sup>-1</sup> for long-term cyclic voltammetry (CV) tests. The long-term stability was tested at controlled current densities.

All the electrochemical measurements for overall hydrazine splitting (OH<sub>2</sub>S) were performed at 25 °C in a two-electrode system powered by CHI 760E electrochemical workstation with 1 M KOH + 0.1 M N<sub>2</sub>H<sub>4</sub> electrolyte. The cathode chamber and anode chamber were separated by a Nafion membrane. For each pair of OH<sub>2</sub>S electrodes, the anode and the cathode were prepared by dropping the catalyst ink on carbon paper.

The electrochemical impedance spectroscopy (EIS) measurements were performed in the frequency range from 0.1 Hz to 100 kHz with an AC amplitude of 5 mV. The electrochemically active surface area (ECSA) could be examined through the electrochemical double-layer capacitance (*C<sub>dl</sub>*). The *C<sub>dl</sub>* can be evaluated by cyclic voltammetry in a non-Faradaic region at various scan rates. Accordingly, a series of CV measurements were conducted with 10 mV s<sup>-1</sup>, 20 mV s<sup>-1</sup>, 30 mV s<sup>-1</sup>, 40 mV s<sup>-1</sup>, and 50 mV s<sup>-1</sup> in 0.1 to 0.2 V vs RHE. The double-layer capacitance values were determined from the slope of the capacitive current versus scan rate.

The current density normalized by electrochemical active surface area was calculated using the following equation:

$$J_{\text{ECSA}} = I / S_{\text{ECSA}}$$

where *J<sub>ECSA</sub>* is the current density normalised by ECSA (mA cm<sup>-2</sup>), *I* is the current (mA), *S<sub>ECSA</sub>* = *C<sub>dl</sub>* / *C<sub>s</sub>* (*C<sub>s</sub>* = 0.035 mF cm<sup>-2</sup>).

## Determine H<sub>2</sub> Faradaic Efficiency

The experimental amounts of H<sub>2</sub> evolved from the cathode during the hydrogen evolution reaction could be measured by the drainage gas collection method. The theoretical volume of H<sub>2</sub> was calculated from the following relationships:

$$V_{\text{H}_2} (\text{mL}) = Q \times 22.4 \text{ L mol}^{-1} \times 1000 / (F \times 2)$$

where  $Q$  is the cumulative charge (C),  $F$  is the Faraday constant (96,485 C mol<sup>-1</sup>).

The Faradic efficiency (FE) was calculated using the following equation:

$$\text{FE} = \frac{\text{Experimental } \mu\text{mol of gas}}{\text{Theoretical } \mu\text{mol of gas}} \times 100\%$$

As for the theoretical quantity, the efficiency of the current produced by the reactions was assumed to be 100 %, which in turn assumes that HER is the only reaction that takes place on the respective electrode.

### Determine N<sub>2</sub>H<sub>4</sub> decomposition

To determine whether hydrazine decomposes to form the mixture products of N<sub>2</sub> and H<sub>2</sub> (N<sub>2</sub>H<sub>4</sub> → N<sub>2</sub> + 2H<sub>2</sub>) in alkaline solution, the gas products in the control experiments were collected and analyzed by an online gas chromatograph. The control experiment was performed as the following: Firstly, approximately 10 mg of the as-prepared catalyst was added into a three-necked round bottom flask. The 1 M KOH + 0.1 M N<sub>2</sub>H<sub>4</sub> aqueous solution was rapidly injected into the flask with magnetic stirring. A stream of Ar continues to flow through the flask to bring the possible gas products into the gas chromatograph for the qualitative analysis.

### TOF Calculations

The turnover frequency (TOF) calculation values of the designed catalysts were measured and calculated according to the following equation:

$$\text{TOF} = \frac{j}{z \times F \times n}$$

where  $j$  is the HER current density ( $\text{A cm}^{-2}$ ) during the LSV measurement in 0.1 M  $\text{H}_2\text{SO}_4$  solutions,  $z$  represents the electron number per mol involved to generate a mole of  $\text{H}_2$  ( $z = 2$ ) in HER.  $F$  is the Faraday constant ( $96,485 \text{ C mol}^{-1}$ ), and  $n$  is the number of active sites.

The  $n$  values can be approximately estimated by CV measurements carried out in 1 M PBS electrolyte ( $\text{pH} = 7$ ) with a scan rate of  $50 \text{ mV s}^{-1}$  at the potential window from  $-0.2$  to  $0.6 \text{ V vs. RHE}$  for HER. After this, by integrating the charge of each CV curve over the whole potential range, the half value of the charge was obtained, which is the value of the surface charge density ( $Q_s$ ). Then, the  $n$  value was computed by  $n = Q_s/F$ .

### Assembly and Tests of Zn- $\text{H}_2$ Battery

The asymmetric Zn- $\text{H}_2$  battery was assembled of carbon paper ( $1 \times 1 \text{ cm}^2$ ) supported Rh-SA/ $\text{Ti}_3\text{C}_2\text{O}_x$  with a mass loading of  $1 \text{ mg cm}^{-2}$  as the cathode, A polished Zn plate as the anode, and 2.0 M  $\text{H}_2\text{SO}_4$  and 4.0 M NaOH as the catholyte and anolyte, respectively. A bipolar membrane (BPM) was used as a separator for preventing bulk neutralization of acidic catholyte and alkaline anolyte. For comparison, the commercial 20 wt% Pt/C catalysts were also measured under the same conditions. The polarization curve measurements were performed by LSV at  $10 \text{ mV s}^{-1}$ . The rate discharging curves and long-time durability test were collected by the electrochemical workstation testing system. Both the current density and power density were normalized to the geometric area of the cathode. For galvanostatic discharge results, the specific capacity ( $C$ ) and energy density ( $E$ ) were calculated as follows:

$$C = I \times t / m$$

$$E = I \times V \times t / m$$

where  $I$  is the applied current,  $V$  is the average discharge voltage,  $t$  is the service hours, and  $m$  is the weight of the consumed Zn plate.

### Calculation of Theoretical Potential of the Zn- $\text{H}_2$ battery

When discharging, the reaction pathways of the acid-alkaline Zn- $\text{H}_2$  battery can be expressed as follows according to the Nernst equation:

Hydrogen evolution reaction at the cathode (2.0 M H<sub>2</sub>SO<sub>4</sub>):

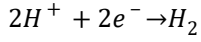

$$E_c = E_{H^{+}/H_2}^{\theta} + 2.303 \frac{RT}{2F} \log \left[ \frac{\alpha_{H_2}}{(\alpha_{H^{+}})^2} \right] = 0 \text{ V} + 0.059 \times \log (\alpha_{H^{+}}) = 0.035 \text{ V}$$

where  $E_{H^{+}/H_2}^{\theta} = 0 \text{ V vs SHE}$ .

Oxidation of Zn at the anode (4.0 M NaOH):

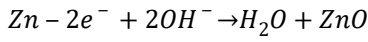

$$E_a = E_{\frac{Zn^{2+}}{Zn}}^{\theta} - 2.303 \frac{RT}{2F} \log [(\alpha_{OH^{-}})^2] = -1.249 \text{ V} - 0.059 \times \log (\alpha_{OH^{-}}) = -1.285 \text{ V}$$

where  $E_{Zn^{2+}/Zn}^{\theta} = -1.249 \text{ V vs SHE}$ .

The overall reaction:

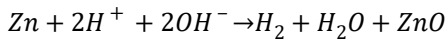

The theoretical electromotive force ( $E_{emf}$ ) of the battery could be:

$$\begin{aligned} E_{emf} &= E_c - E_a \\ &= E_{\frac{H^{+}}{H_2}}^{\theta} - 2.303 \frac{RT}{2F} \log \left[ \frac{\alpha_{H_2}}{(\alpha_{H^{+}})^2} \right] - \left\{ E_{\frac{Zn^{2+}}{Zn}}^{\theta} - 2.303 \frac{RT}{4F} \log [(\alpha_{OH^{-}})^2] \right\} \\ &= E_{\frac{H^{+}}{H_2}}^{\theta} - E_{\frac{Zn^{2+}}{Zn}}^{\theta} + 0.059 \times [\log (\alpha_{H^{+}}) + \log (\alpha_{OH^{-}})] = 1.32 \text{ V} \end{aligned}$$

where  $R$  is the gas constant (8.314 J mol<sup>-1</sup> K<sup>-1</sup>),  $F$  is the faraday constant (96,485 C mol<sup>-1</sup>),  $T$  is 298.15 K, and  $\alpha$  is the corresponding activity.

### Calculation of Theoretical Energy Density of the Zn-H<sub>2</sub> battery

The theoretical energy density of the Zn-H<sub>2</sub> battery could be:

$$ED_{theo} = C_{theo} V_{cell} = 820 \text{ mAh g}^{-1} \times 1.32 \text{ V} = 1082.4 \text{ Wh kg}^{-1}$$

where  $C_{Zn}$  is the theoretical capacity of the battery based on Zn anode.



## Assembly and Tests of Self-Powered Dual Hydrogen Production System

The self-powered dual hydrogen production system was consisted of integrating a Zn-H<sub>2</sub> battery using Rh-SA/Ti<sub>3</sub>C<sub>2</sub>O<sub>x</sub> cathode and Zn plate as the anode to drive OH<sub>2</sub>S for H<sub>2</sub> production. In this system, hydrogen could be generated simultaneously from two pathways: the cathode of the Zn-H<sub>2</sub> unit and the cathode of the OH<sub>2</sub>S. The experimental amounts of H<sub>2</sub> evolved from the cathode during the hydrogen evolution reaction could be measured by the drainage gas collection method.

## Computational Details

All calculations were performed with dispersion-corrected DFT in the DMol<sup>3</sup> code. The starting models of pristine MXene Ti<sub>3</sub>C<sub>2</sub> were constructed conventionally by removing Al sheets from the parent MAX phase Ti<sub>3</sub>AlC<sub>2</sub>. The two-dimension material consists of five (Ti<sub>3</sub>C<sub>2</sub>) atomic sheets with a hexagonal-like unit cell. The atomic models of the functionalized MXenes were designed assuming their complete surface termination by oxygen atoms. The periodic system had a vacuum thickness of 15 Å, which was used to eliminate spurious interactions between the adsorbate and the periodic image of the bottom layer of the surface. All the computations were performed with spin-polarized DFT implemented in the DMol<sup>3</sup> code of the Materials Studio. A generalized gradient approximation (GGA) with the Perdew, Burke, and Ernzerhof (PBE) exchange-correlation functionals was employed. The double numerical plus polarization (DNP) was used as the basis set. Effective core potentials were adopted as the core treatment to conduct a metal relativistic effect. The geometry convergence tolerance for energy change was  $1 \times 10^{-6}$  Ha, the max force was 0.002 Ha/Å, and the max displacement was 0.005 Å. We chose 5.2 Å to be the real-space global orbital cutoff radius. The structural optimization was performed without any constraints. The Gibbs free energy change ( $\Delta G$ ) of each elemental step was calculated according to the CHE model, which used one-half of the chemical potential of hydrogen as the chemical potential of the proton-electron pairs.  $\Delta G$  was calculated by the equation:  $\Delta G = \Delta E + \Delta E_{\text{ZPE}} + \Delta G_U - T\Delta S$ , where  $\Delta E$  is the electronic energy difference directly obtained from DFT

calculations,  $\Delta E_{\text{ZPE}}$  is the zero-point energy,  $T$  is the temperature ( $T = 298.15$  K),  $\Delta S$  is the change in entropy, and  $\Delta G_U$  is the free energy contributions related to the applied electrode potential  $U$ .

## Supplementary Figures

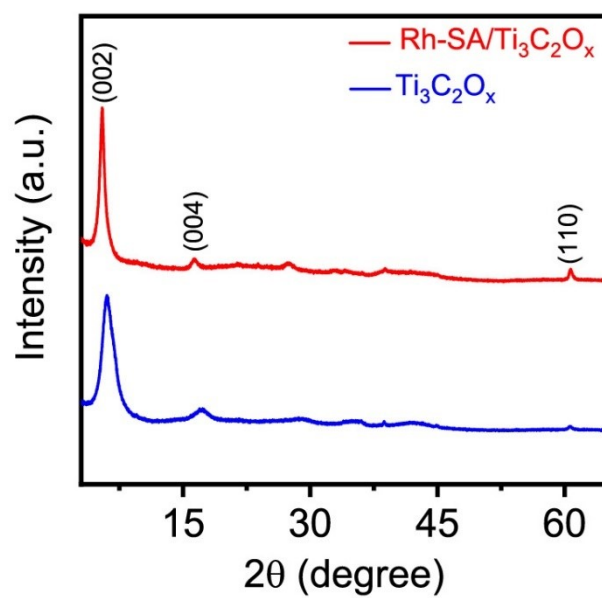

Figure S1. XRD patterns of the as-prepared Rh-SA/Ti<sub>3</sub>C<sub>2</sub>O<sub>x</sub> and Ti<sub>3</sub>C<sub>2</sub>O<sub>x</sub> samples.

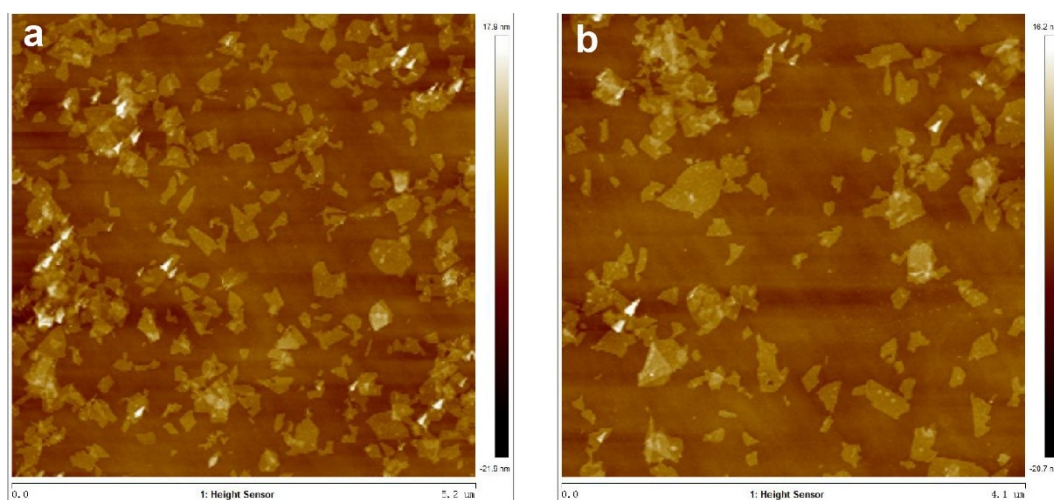

**Figure S2.** The additional AFM images of the as-prepared Rh-SA/Ti<sub>3</sub>C<sub>2</sub>O<sub>x</sub> sample.

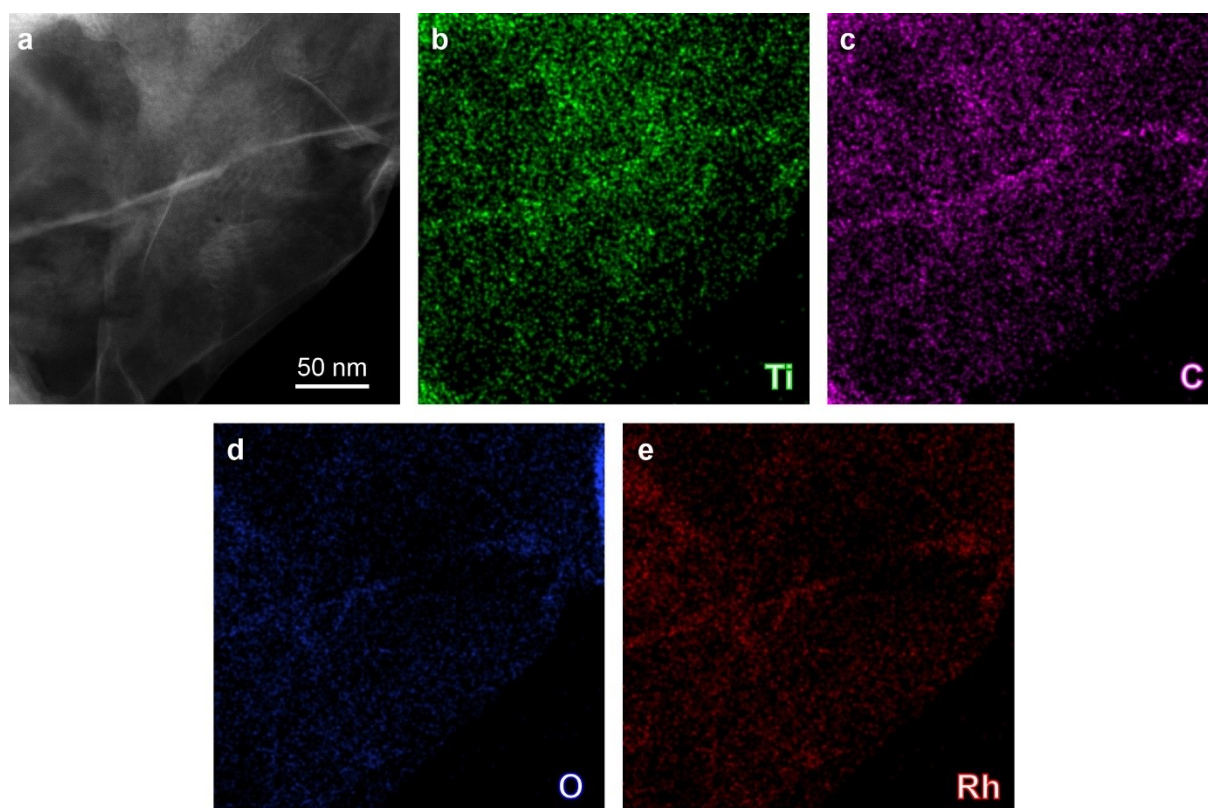

**Figure S3. The EDS mapping characterization of the as-prepared Rh-SA/Ti<sub>3</sub>C<sub>2</sub>O<sub>x</sub> sample.** (a) HAADF-STEM image, (b-e) the corresponding EDS element mapping. From the HAADF-STEM image, the Rh nanoclusters or nanoparticles cannot be observed. The EDS elemental mapping confirms the homogeneous distribution of these elements in the composite.

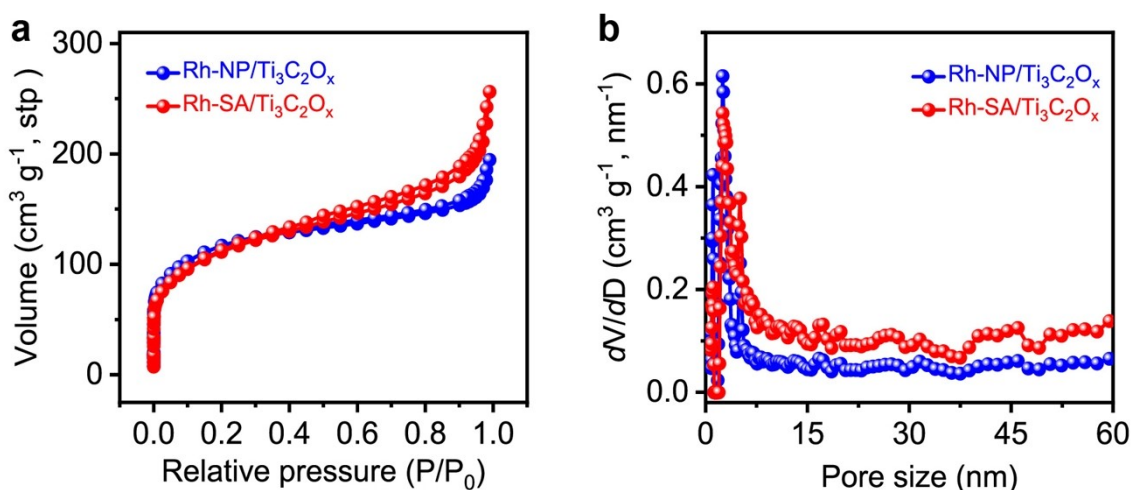

**Figure S4.** The BET measurements of the as-prepared Rh-NP/Ti<sub>3</sub>C<sub>2</sub>O<sub>x</sub> and Rh-SA/Ti<sub>3</sub>C<sub>2</sub>O<sub>x</sub> samples. (a) N<sub>2</sub> adsorption/desorption isotherm curves. (b) The corresponding pore size distribution. The pore structure and specific surface areas properties of the as-prepared samples were characterized by N<sub>2</sub> adsorption/desorption measurements. As result, the as-synthesized Rh-SA/Ti<sub>3</sub>C<sub>2</sub>O<sub>x</sub> nanosheets possess a specific surface area of 441.81 m<sup>2</sup> g<sup>-1</sup> with a pore volume of 0.333 cm<sup>3</sup> g<sup>-1</sup>. Moreover, the Rh-SA/Ti<sub>3</sub>C<sub>2</sub>O<sub>x</sub> sample showed a prominent pore size distribution around 2.5 nm. Besides, Rh-NP/Ti<sub>3</sub>C<sub>2</sub>O<sub>x</sub> (Specific surface areas: 416.61 m<sup>2</sup> g<sup>-1</sup>; Pore volume: 0.397 cm<sup>3</sup> g<sup>-1</sup>; Prominent pore size: 2.5 nm) exhibited a similar pore structure and specific surface areas properties to that of Rh-SA/Ti<sub>3</sub>C<sub>2</sub>O<sub>x</sub>, which provides higher comparability for the electrochemical performance comparison of Rh-SA/Ti<sub>3</sub>C<sub>2</sub>O<sub>x</sub> and Rh-SA/Ti<sub>3</sub>C<sub>2</sub>O<sub>x</sub>.

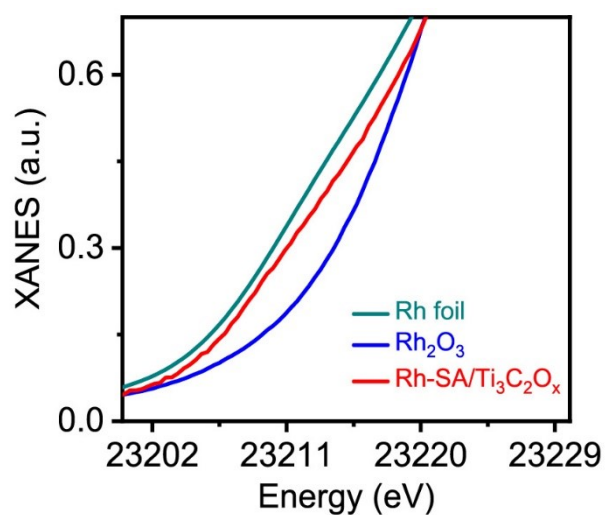

**Figure S5.** The detailed view of Rh *K*-edge XANES curves of Rh-SA/Ti<sub>3</sub>C<sub>2</sub>O<sub>x</sub>, as well as Rh foil and Rh<sub>2</sub>O<sub>3</sub> references. Clearly, the absorption edge position of the white line for Rh-SA/Ti<sub>3</sub>C<sub>2</sub>O<sub>x</sub> was located between those of Rh foil and Rh<sub>2</sub>O<sub>3</sub>, indicating that the valence state of Rh single atoms is situated between that of Rh<sup>0</sup> and Rh<sup>+3</sup>.



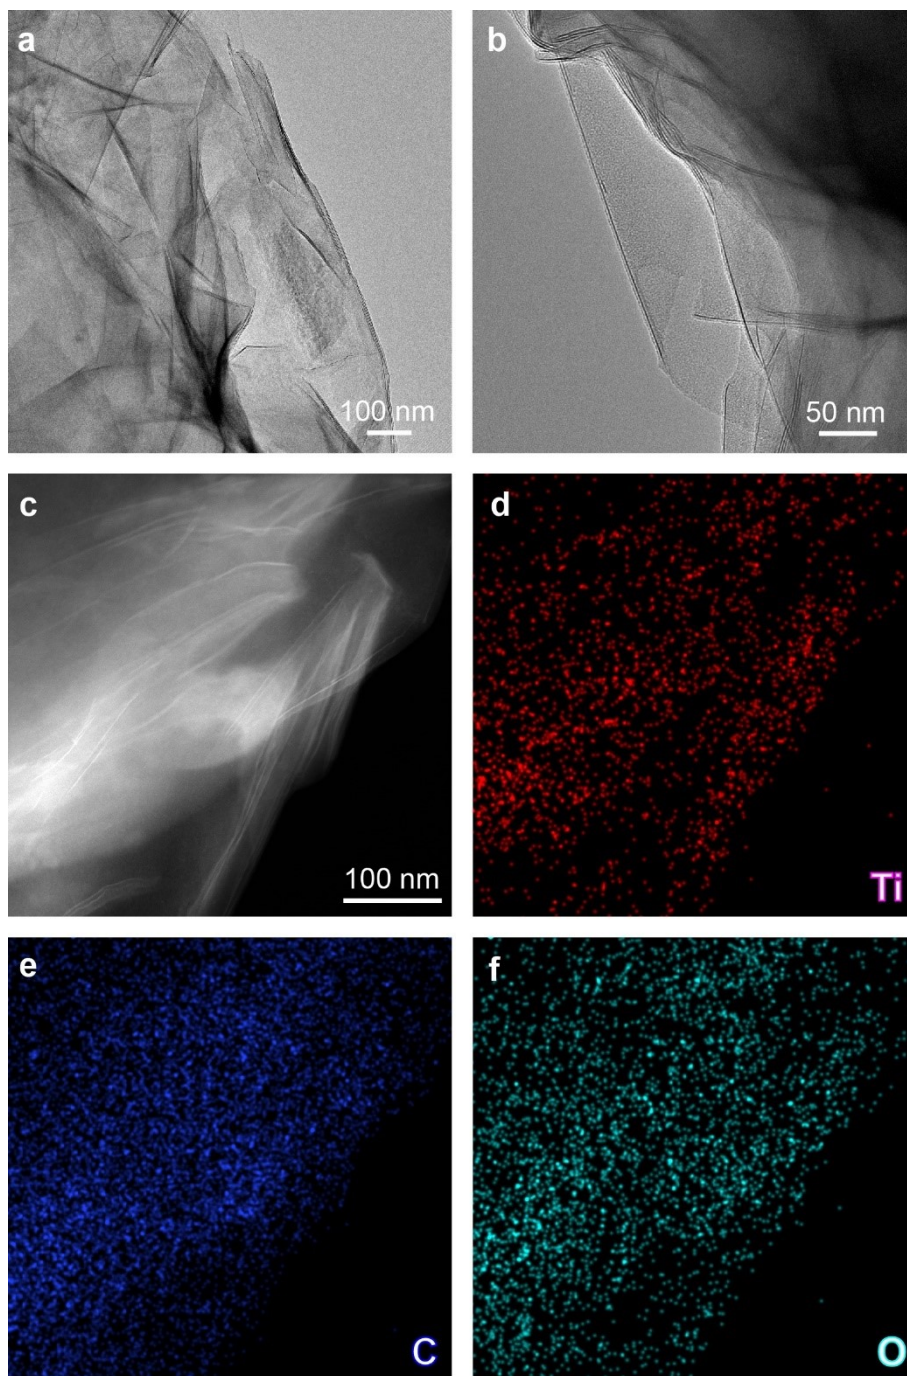

**Figure S6.** The morphology and EDS mapping characterizations of the as-prepared  $\text{Ti}_3\text{C}_2\text{O}_x$  sample. (a,b) TEM images. (c) HAADF-STEM image. (d-f) EDS element mapping corresponding to (c). From the TEM images, the  $\text{Ti}_3\text{C}_2\text{O}_x$  displayed ultrathin nanosheet morphology with a few layers. The EDS elemental mapping confirms the homogeneous distribution of these elements in the composite.



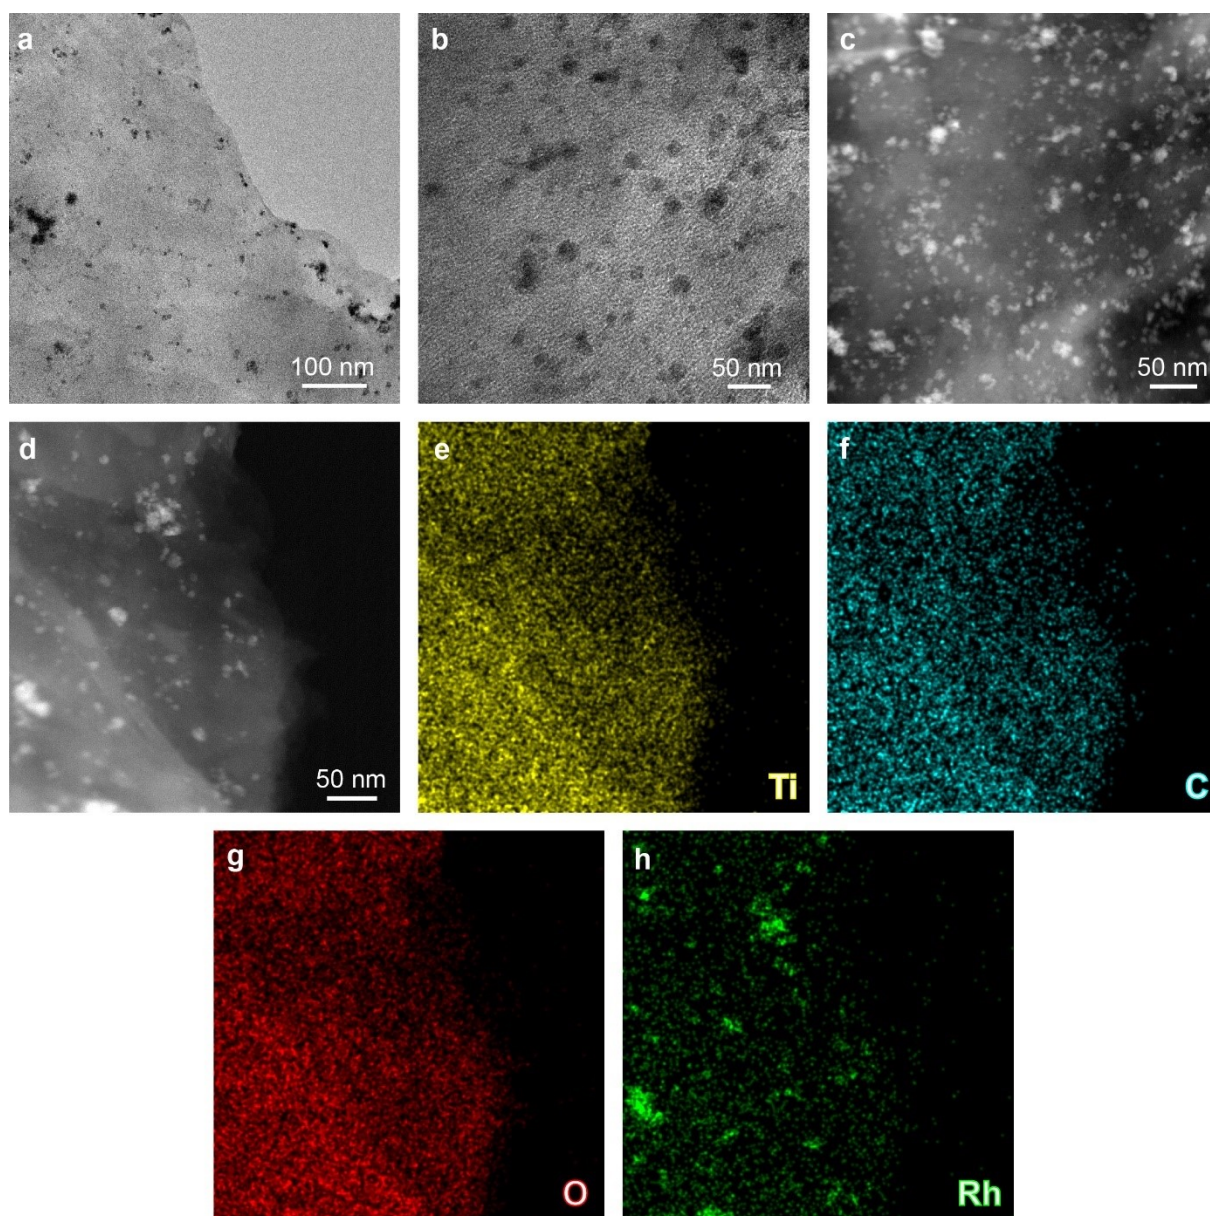

**Figure S7.** The morphology and EDS mapping characterizations of the as-prepared Rh-NP/Ti<sub>3</sub>C<sub>2</sub>O<sub>x</sub> sample.

(a,b) TEM images. (c,d) HAADF-STEM images. (e–h) EDS element mapping corresponding to (d). From the TEM images, the Rh nanoparticles can be clearly observed. The EDS elemental mapping confirms the homogeneous distribution of these elements in the composite. The Rh loading was determined to be 3.75 wt.% by ICP-OES analysis.

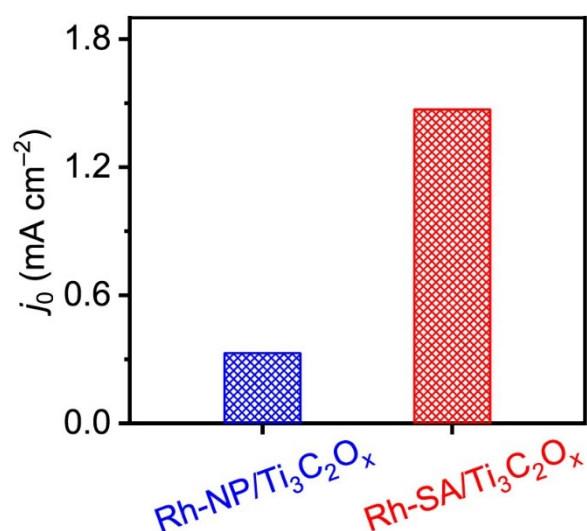

**Figure S8.** The exchange current densities ( $j_0$ ) of the Rh-NP/Ti<sub>3</sub>C<sub>2</sub>O<sub>x</sub> and Rh-SA/Ti<sub>3</sub>C<sub>2</sub>O<sub>x</sub> catalysts. As shown, the value of  $j_0$  of the Rh-SA/Ti<sub>3</sub>C<sub>2</sub>O<sub>x</sub> catalyst was 1.57 mA cm<sup>-2</sup>, which was much higher than Rh-NP/Ti<sub>3</sub>C<sub>2</sub>O<sub>x</sub> (0.33 mA cm<sup>-2</sup>) and those of most previously reported HER electrocatalysts (**Table S3**, Supporting Information)), suggesting a more rapid HER rate and an additional kinetic advantage for Rh-SA/Ti<sub>3</sub>C<sub>2</sub>O<sub>x</sub>.

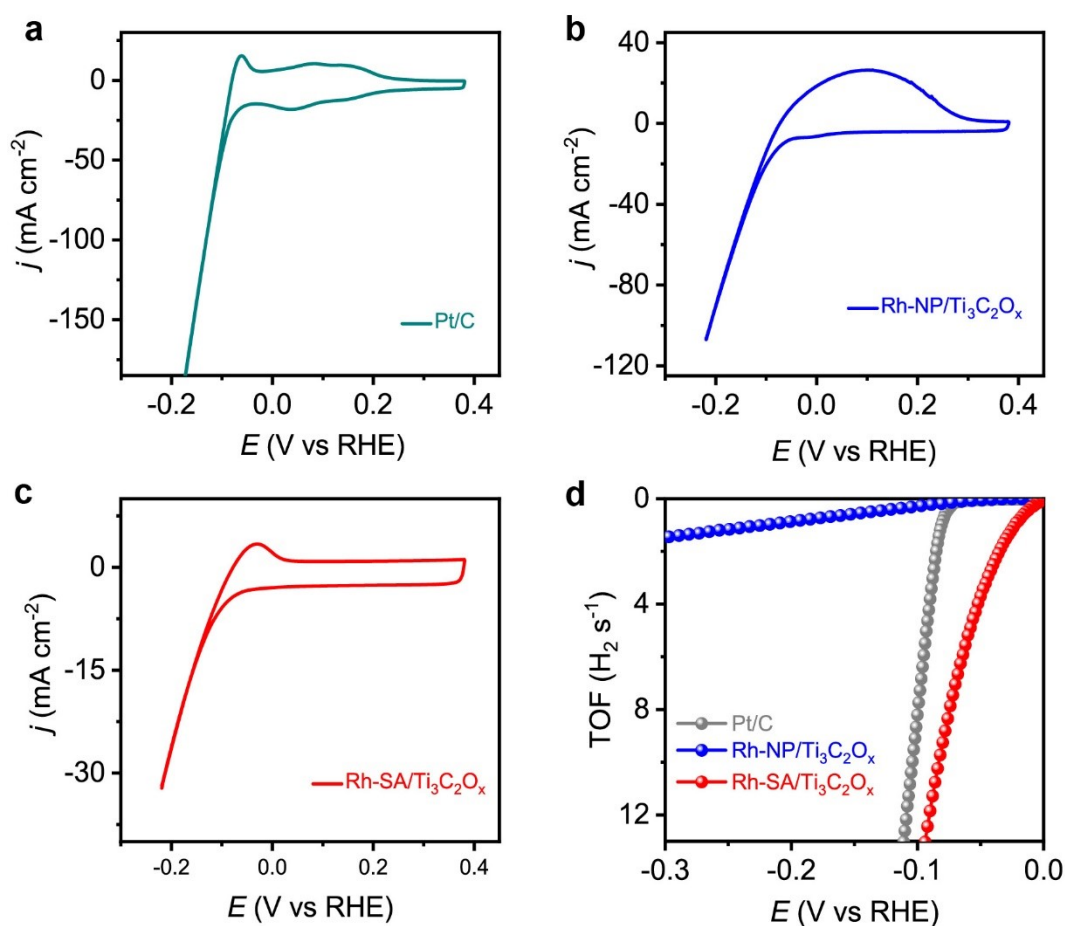

**Figure S9. Determination of active sites and TOF values for HER.** (a) HER CV curves of Pt/C. (b) HER CV curves of Rh-NP/Ti<sub>3</sub>C<sub>2</sub>O<sub>x</sub>. (c) HER CV curves of Rh-SA/Ti<sub>3</sub>C<sub>2</sub>O<sub>x</sub>. (d) TOF plots for HER.

By the curves in (a) here (see more details in Methods), the  $Q_s$  values of Pt/C, Rh-NP/Ti<sub>3</sub>C<sub>2</sub>O<sub>x</sub>, and Rh-SA/Ti<sub>3</sub>C<sub>2</sub>O<sub>x</sub> were measured to be  $3.986 \times 10^{-2}$ ,  $4.568 \times 10^{-2}$ , and  $0.971 \times 10^{-3}$  C cm<sup>-2</sup>, respectively. Thus, their corresponding  $n$  values under HER conditions were calculated to be  $4.131 \times 10^{-8}$ ,  $4.766 \times 10^{-8}$ , and  $1.006 \times 10^{-8}$  mol cm<sup>-2</sup>, respectively. Based on the above results, the TOF values were calculated and plotted in d. As shown, Rh-SA/Ti<sub>3</sub>C<sub>2</sub>O<sub>x</sub> exhibited a larger TOF value, indicating its higher intrinsic activity than those of the counterparts.

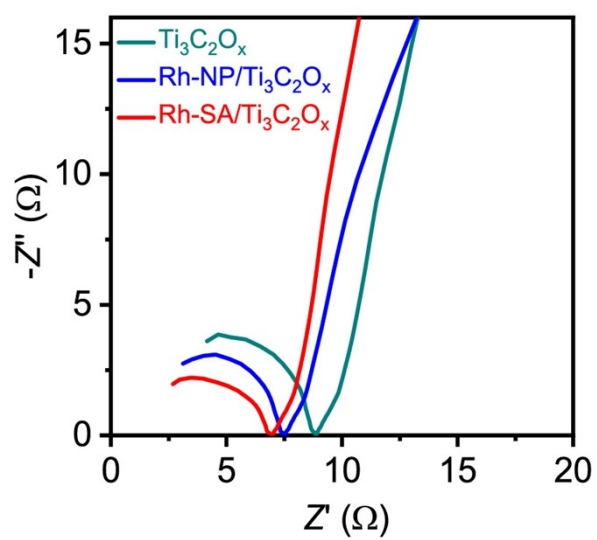

Figure S10. Nyquist plots of the  $\text{Ti}_3\text{C}_2\text{O}_x$ ,  $\text{Rh-NP/Ti}_3\text{C}_2\text{O}_x$  and  $\text{Rh-SA/Ti}_3\text{C}_2\text{O}_x$  electrodes.

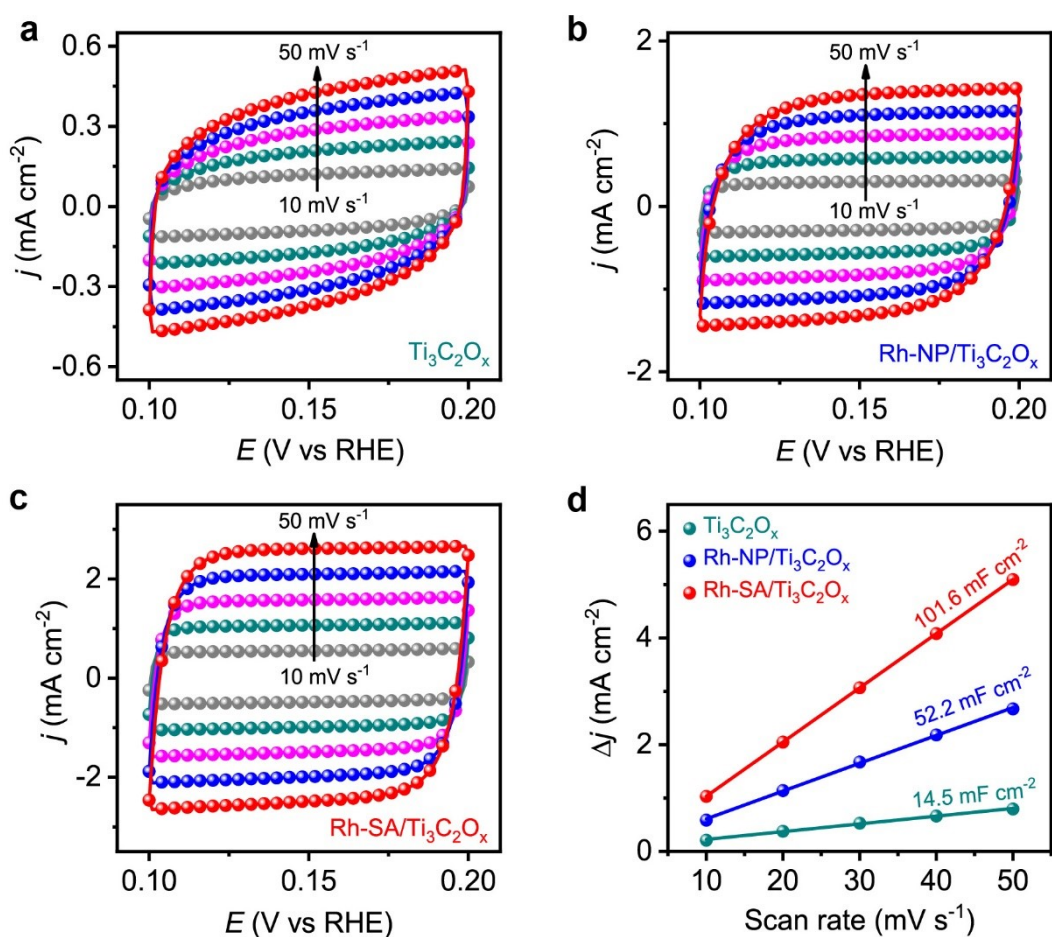

**Figure S11. The determination of  $C_{dl}$ .** (a–c), CV curves of  $Ti_3C_2O_x$  in (a) and  $Rh-NP/Ti_3C_2O_x$  in (b) and  $Rh-SA/Ti_3C_2O_x$  in c, which has been measured in 0.1 M  $H_2SO_4$  aqueous electrolyte with various scan rates of 10, 20, 30, 40, and 50  $mV s^{-1}$  in the non-faradaic region. (d) The capacitive current densities as a function of scan rate for the different catalysts.

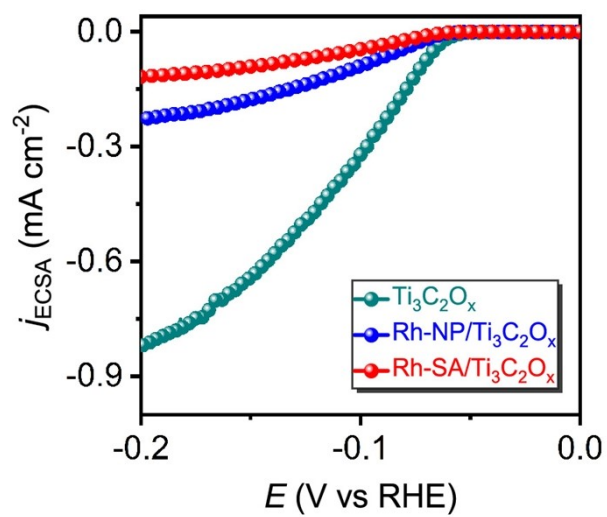

Figure S12. ECSA normalized polarization curves recorded at a scan rate of 10 mV s<sup>-1</sup> in 0.1 M H<sub>2</sub>SO<sub>4</sub> aqueous solution.



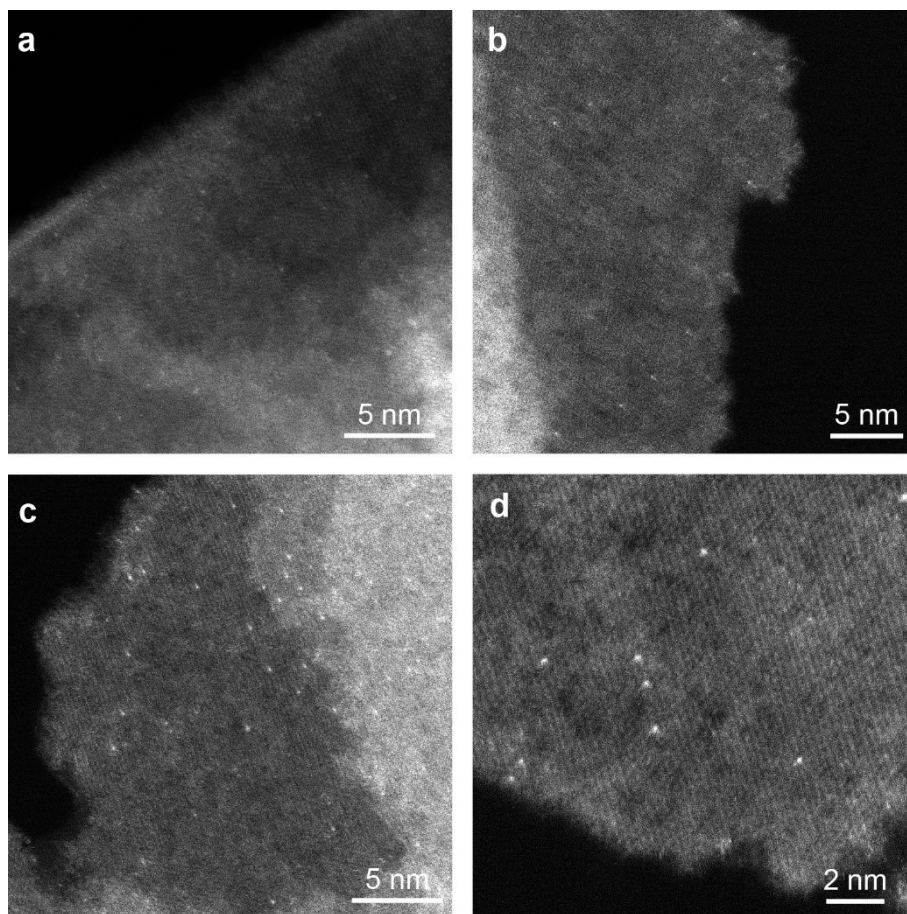

**Figure S13.** The atomic-resolution HAADF-STEM images of Rh-SA/Ti<sub>3</sub>C<sub>2</sub>O<sub>x</sub> after HER stability test with **5,000 continuous cyclic voltammetry cycles**. These images were taken from randomly selected regions of the sample. As seen, no clusters and particles could be observed on the surface of the Rh-SA/Ti<sub>3</sub>C<sub>2</sub>O<sub>x</sub> nanosheets after the stability test, further excluding the possible formation of Rh nanoclusters or nanoparticles, confirming its robust structural stability during the HER process.

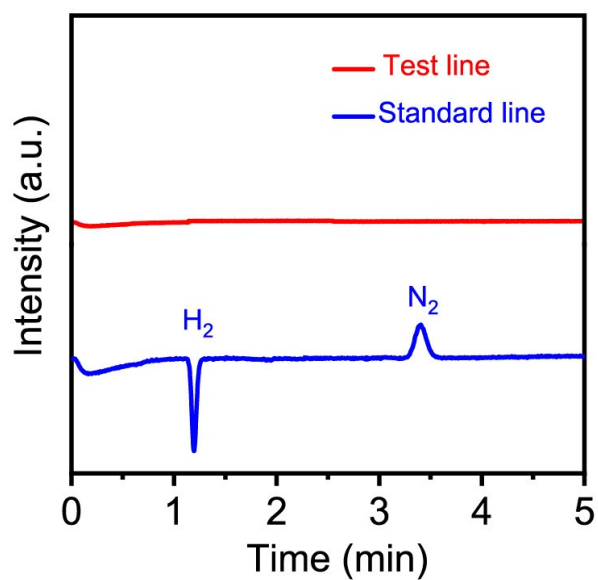

**Figure S14.** The control experiments for determining the possible gas products from the direct  $\text{N}_2\text{H}_4$  decomposition. The blue curve is the standard line containing  $\text{N}_2$  and  $\text{H}_2$ , and the red curve is the test line of the control experiment. As shown, no  $\text{N}_2$  and  $\text{H}_2$  were detected in the control experiment, confirming the Rh-SA/ $\text{Ti}_3\text{C}_2\text{O}_x$  catalyst cannot catalyze the direct decomposition of hydrazine in alkaline solution.



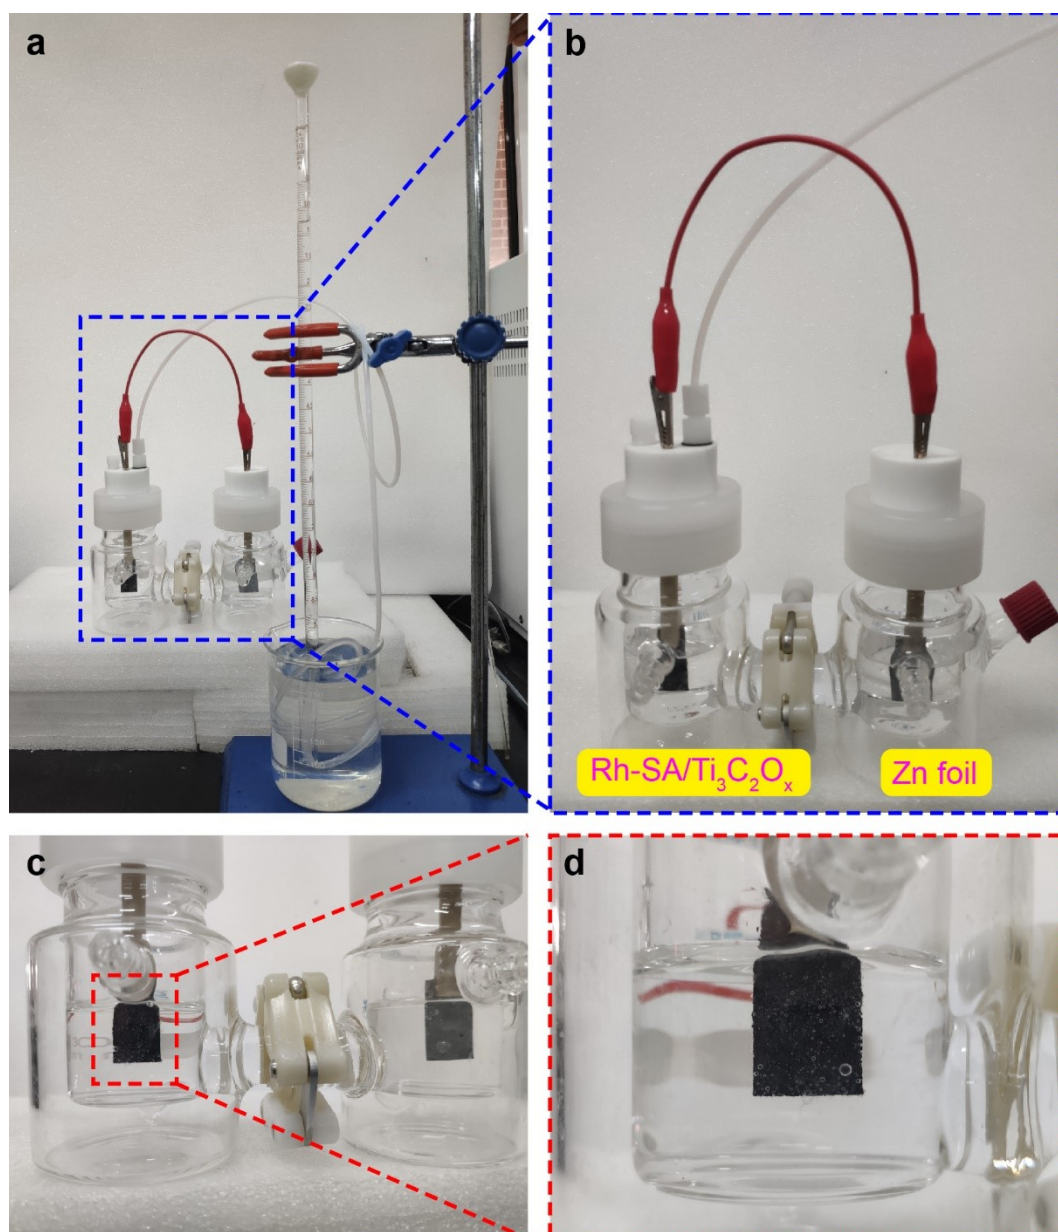

**Figure S15.** The digital photograph of the homemade gas collection device for the Zn-H<sub>2</sub> battery system.

The enlarged view in (d) displayed the generated hydrogen bubbles over the Rh-SA/Ti<sub>3</sub>C<sub>2</sub>O<sub>x</sub> electrode.

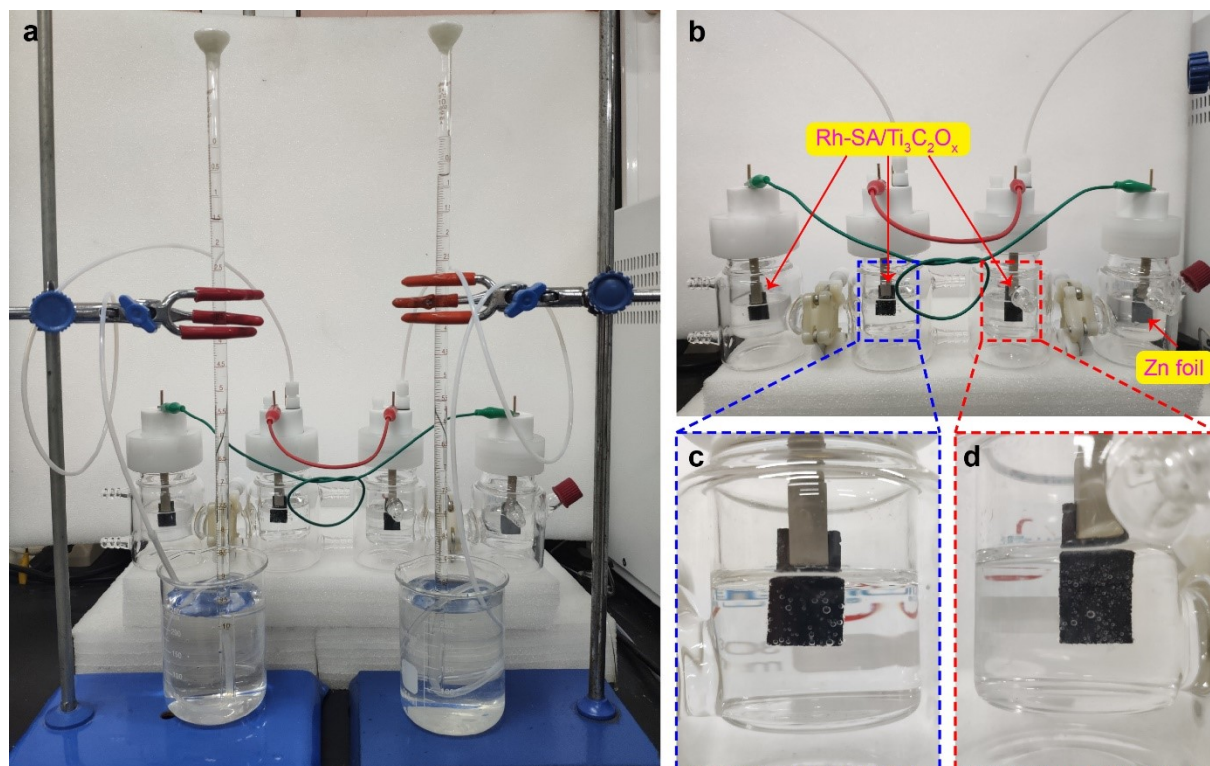

**Figure S16. The digital photograph of the homemade gas collection device for the self-powered dual hydrogen production system.** The enlarged view in (c) and (d) displayed the generated hydrogen bubbles over the cathode of the OHzS (c) and the Zn-H<sub>2</sub> battery (d), respectively.

## Supplementary Tables

**Table S1.** The structural parameters extracted from the Rh *K*-edge EXAFS fitting for the Rh-SA/Ti<sub>3</sub>C<sub>2</sub>O<sub>x</sub> sample.

| Sample                                              | Bond type | <i>N</i> | <i>R</i> (Å) | $\sigma^2(10^{-3} \text{ Å}^2)$ | $\Delta E_0(\text{eV})$ | <i>R</i> factor |
|-----------------------------------------------------|-----------|----------|--------------|---------------------------------|-------------------------|-----------------|
| Rh-SA/Ti <sub>3</sub> C <sub>2</sub> O <sub>x</sub> | Rh-O      | 3        | 2.07 ± 0.05  | 0.0054                          | -5.477                  | 0.0029          |
|                                                     | Rh-Ti     | 3        | 2.13 ± 0.03  | -0.0005                         | -5.477                  |                 |

$S_0^2$  is the amplitude reduction factor; *N* is the coordination number; *R* is the interatomic distance (the bond length between central atoms and surrounding coordination atoms);  $\sigma^2$  is Debye-Waller factor (a measure of thermal and static disorder in absorber-scatterer distances);  $\Delta E_0$  is an edge-energy shift (the difference between the zero kinetic energy value of the sample and that of the theoretical model). *R* factor is used to value the goodness of the fitting.

Table S2. Comparison of the HER performance of Rh-SA/Ti<sub>3</sub>C<sub>2</sub>O<sub>x</sub> with previously electrocatalysts in acidic conditions.

| <i>Catalysts</i>                                    | <i>Electrolyte</i>                   | $\eta_{10}$<br>(mV vs RHE) | <i>Tafel</i><br>(mV dec <sup>-1</sup> ) | <i>Stability</i>          | <i>References</i>                            |
|-----------------------------------------------------|--------------------------------------|----------------------------|-----------------------------------------|---------------------------|----------------------------------------------|
| Rh-SA/Ti <sub>3</sub> C <sub>2</sub> O <sub>x</sub> | 0.1 M H <sub>2</sub> SO <sub>4</sub> | 23                         | 27.8                                    | 24 h + 5,000<br>CV cycles | This work                                    |
| B-CoP/CNT                                           | 0.5 M H <sub>2</sub> SO <sub>4</sub> | 39                         | 50                                      | 100 h                     | Angew. Chem. Int. Ed. 2020, 59,<br>4154      |
| CoP/NPC/TF                                          | 0.5 M H <sub>2</sub> SO <sub>4</sub> | 91                         | 54                                      | 10 h                      | Adv. Energy Mater. 2019, 9,<br>1803970       |
| Ce, N-CoP/CC                                        | 0.5 M H <sub>2</sub> SO <sub>4</sub> | 66                         | 53                                      | 60 h                      | Sustain. Energy Fuels, 2019, 3,<br>3344      |
| CeO <sub>2</sub> /Co <sub>4</sub> N                 | 0.5 M H <sub>2</sub> SO <sub>4</sub> | 33                         | 65                                      | 12 h                      | Appl. Catal. B-Environ. 2020, 277,<br>119282 |
| Co@NG/NRGO                                          | 0.5 M H <sub>2</sub> SO <sub>4</sub> | 91                         | 62                                      | 36 h                      | Chem. Commun., 2020, 56, 567                 |
| Co <sub>0.31</sub> Mo <sub>1.69</sub> C/MXene/NC    | 0.5 M H <sub>2</sub> SO <sub>4</sub> | 81                         | 24                                      | 100 h                     | Adv. Energy Mater. 2019, 9,<br>1901333       |
| N-Co-S/G                                            | 0.5 M H <sub>2</sub> SO <sub>4</sub> | 67.7                       | 56.3                                    | 100 h                     | Nano Energy 2021, 80, 105544                 |
| Co-P@PC-750                                         | 0.5 M H <sub>2</sub> SO <sub>4</sub> | 72                         | 49                                      | 20 h                      | Small 2020, 16, 1900550                      |

|                                                                          |                                      |      |       |                     |                                              |
|--------------------------------------------------------------------------|--------------------------------------|------|-------|---------------------|----------------------------------------------|
| <b>CoP-400</b>                                                           | 0.5 M H <sub>2</sub> SO <sub>4</sub> | 113  | 67    | 70,000 s            | Small 2018, 14, 1802824                      |
| <b>CoP/Ni<sub>2</sub>P@HPNCP</b>                                         | 0.5 M H <sub>2</sub> SO <sub>4</sub> | 130  | 64.91 | 20 h                | Nanoscale, 2020, 12, 23851                   |
| <b>CoS<sub>2</sub>@MoS<sub>2</sub>@CC-30h</b>                            | 0.5 M H <sub>2</sub> SO <sub>4</sub> | 65   | 122   | 20 h                | Adv. Mater. Interfaces 2020, 7,<br>2000780   |
| <b>Cu@WC</b>                                                             | 0.5 M H <sub>2</sub> SO <sub>4</sub> | 92   | 50.5  | 12 h                | Appl. Catal. B-Environ. 2021, 280,<br>119451 |
| <b>Cu<sub>0.075</sub>Co<sub>0.925</sub>P/CP</b>                          | 0.5 M H <sub>2</sub> SO <sub>4</sub> | 47   | 47.2  | 24 h                | J. Mater. Chem. A, 2019, 7,<br>14271         |
| <b>N<sub>V</sub>-Fe<sub>2</sub>N-350</b>                                 | 0.5 M H <sub>2</sub> SO <sub>4</sub> | 54   | 41.2  | 50 h                | Adv. Mater. 2020, 32, 1904346                |
| <b>FeP/NCNSs</b>                                                         | 0.5 M H <sub>2</sub> SO <sub>4</sub> | 114  | 64    | 20 h                | ACS Sustainable Chem. Eng.<br>2018, 6, 11587 |
| <b>FeP/Ti</b>                                                            | 0.5 M H <sub>2</sub> SO <sub>4</sub> | 79   | 58    | 10 h                | Appl. Catal. B-Environ. 2020, 260,<br>118156 |
| <b>Fe<sub>0.43</sub>Co<sub>2.57</sub>(PO<sub>4</sub>)<sub>2</sub>/Cu</b> | 0.5 M H <sub>2</sub> SO <sub>4</sub> | 63.8 | 42.4  | 100 h               | ACS Sustainable Chem. Eng.<br>2020, 8, 13793 |
| <b>CoP/CC</b>                                                            | 0.5 M H <sub>2</sub> SO <sub>4</sub> | 67   | 51    | 22.5 h              | J. Am. Chem. Soc. 2014, 136,<br>7587         |
| <b>FeP/C</b>                                                             | 0.5 M H <sub>2</sub> SO <sub>4</sub> | 71   | 52    | 10,000 CV<br>cycles | J. Am. Chem. Soc. 2017, 139,<br>6669         |

|                                         |                                      |     |      |        |                                            |
|-----------------------------------------|--------------------------------------|-----|------|--------|--------------------------------------------|
| <b>CoP/CNT</b>                          | 0.5 M H <sub>2</sub> SO <sub>4</sub> | 122 | 54   | 18 h   | Angew. Chem. Int. Ed. 2014, 53, 6710       |
| <b>Co<sub>2</sub>P@N,P-PCN/CNTs</b>     | 0.5 M H <sub>2</sub> SO <sub>4</sub> | 126 | 45   | 25 h   | J. Mater. Chem. A 2016, 4, 15501           |
| <b>Co-Ni-P/NF</b>                       | 0.5 M H <sub>2</sub> SO <sub>4</sub> | 68  | 56.4 | 40 h   | Catal. Today 2017, 287, 122                |
| <b>Co phosphide/phosphate thin film</b> | 0.5 M H <sub>2</sub> SO <sub>4</sub> | 150 | 53   | 13.9 h | Adv. Mater. 2015, 27, 3175                 |
| <b>Urchin-like CoP/GC</b>               | 0.5 M H <sub>2</sub> SO <sub>4</sub> | 105 | 46   | 30 h   | Nano Lett. 2015, 15, 7616                  |
| <b>Fe-Co<sub>2</sub>P/NCNTs</b>         | 0.5 M H <sub>2</sub> SO <sub>4</sub> | 104 | 58   | 16.7 h | ACS Appl. Mater. Interfaces 2016, 8, 13890 |
| <b>CoMoP@C/GC</b>                       | 0.5 M H <sub>2</sub> SO <sub>4</sub> | 41  | 49.7 | 24 h   | Energy Environ. Sci. 2017, 10, 788         |
| <b>Co<sub>2</sub>P nanorods/Ti</b>      | 0.5 M H <sub>2</sub> SO <sub>4</sub> | 134 | 71   | 12 h   | Nano Energy 2014, 9, 373                   |
| <b>CoPS/GE</b>                          | 0.5 M H <sub>2</sub> SO <sub>4</sub> | 128 | 57   | 36 h   | Nat. Mater. 2015, 14, 1245                 |
| <b>rGO-few layer FePS<sub>3</sub></b>   | 0.5 M H <sub>2</sub> SO <sub>4</sub> | 108 | 54   | 50 h   | ACS Energy Lett. 2016, 1, 367              |
| <b>Se-rich MoSe<sub>2</sub></b>         | 0.5 M H <sub>2</sub> SO <sub>4</sub> | 130 | 46   | 12 h   | ACS Nano 2020, 14, 6295                    |

|                                                       |                                      |      |      |                 |                                           |
|-------------------------------------------------------|--------------------------------------|------|------|-----------------|-------------------------------------------|
| <b>Mo-WC@NCS</b>                                      | 0.5 M H <sub>2</sub> SO <sub>4</sub> | 155  | 78   | 12 h            | Nano Energy 2020, 74, 104850              |
| <b>CoP NW/Hb</b>                                      | 0.5 M H <sub>2</sub> SO <sub>4</sub> | 78   | 68   | 14 h            | Nano Res. 2017, 10, 1010                  |
| <b>Ni-C-N NS</b>                                      | 0.5 M H <sub>2</sub> SO <sub>4</sub> | 60.9 | 32   | 70 h            | J. Am. Chem. Soc. 2016, 138, 14546        |
| <b>C<sub>3</sub>N<sub>4</sub>@N-doped graphene</b>    | 0.5 M H <sub>2</sub> SO <sub>4</sub> | 240  | 51.5 | 1,000 CV cycles | Nat. Commun. 2014, 5, 3783                |
| <b>NiCo<sub>2</sub>P<sub>x</sub>/CF</b>               | 0.5 M H <sub>2</sub> SO <sub>4</sub> | 104  | 59.6 | 30 h            | Adv. Mater. 2017, 29, 1605502             |
| <b>S-MoO<sub>2</sub>-2</b>                            | 0.5 M H <sub>2</sub> SO <sub>4</sub> | 176  | 57   | 1,000 CV cycles | Nano Res. 2019, 13, 121                   |
| <b>MoS<sub>2</sub>-C<sub>3</sub>N<sub>4</sub>-60</b>  | 0.5 M H <sub>2</sub> SO <sub>4</sub> | 173  | 53   | 1,000 CV cycles | J. Catal. 2019, 375, 441                  |
| <b>Mo<sub>2</sub>F<sub>x</sub>C<sub>1-x</sub>/rGO</b> | 1 M HClO <sub>4</sub>                | 95   | 86   | 48 h            | ACS Sustainable Chem. Eng. 2020, 8, 10284 |
| <b>Mo-Ni<sub>2</sub>P/NF</b>                          | 0.5 M H <sub>2</sub> SO <sub>4</sub> | 67   | 77   | 24 h            | Nanoscale 2017, 9, 16674                  |
| <b>MoP/CNT-700</b>                                    | 0.5 M H <sub>2</sub> SO <sub>4</sub> | 83   | 60   | 40 h            | Adv. Funct. Mater. 2018, 28, 1706523      |

$\eta_{10}$  is the overpotential at the current density of  $-10 \text{ mA cm}^{-2}$  except those specified else.

Table S3. Comparison of the HER exchange current density ( $j_0$ ) of Rh-SA/Ti<sub>3</sub>C<sub>2</sub>O<sub>x</sub> with previously electrocatalysts.

| <i>Catalysts</i>                                    | <i>Electrolyte</i>                   | <i><math>j_0</math><br/>(mA cm<sup>-2</sup>)</i> | <i>References</i>                          |
|-----------------------------------------------------|--------------------------------------|--------------------------------------------------|--------------------------------------------|
| Rh-SA/Ti <sub>3</sub> C <sub>2</sub> O <sub>x</sub> | 0.1 M H <sub>2</sub> SO <sub>4</sub> | 1.57                                             | This work                                  |
| Pd <sup>0</sup> /GDY                                | 0.5 M H <sub>2</sub> SO <sub>4</sub> | 0.282                                            | iScience 2019, 11, 31                      |
| MoC-Mo <sub>2</sub> C/PNCDs                         | 1.0 M KOH                            | 0.15                                             | Adv. Mater. 2019, 31, 1900699              |
| MoNi <sub>4</sub>                                   | 1.0 M KOH                            | 1.24                                             | <u>Nat. Commun.</u> 2017, <b>8</b> , 15437 |
| Mo <sub>2</sub> C-WC                                | 0.5 M H <sub>2</sub> SO <sub>4</sub> | 0.419                                            | J. Mater. Chem. A, 2017,5, 18494           |
|                                                     | 1.0 M KOH                            | 0.804                                            |                                            |
| Ru-SA/Ti <sub>3</sub> C <sub>2</sub> T <sub>x</sub> | 0.1 M HClO <sub>4</sub>              | 0.06                                             | Small 2020, 6, 2002888                     |
| CoP/CC                                              | 0.5 M H <sub>2</sub> SO <sub>4</sub> | 0.288                                            | J. Am. Chem. Soc. 2014, 136, 7587          |
| 2H Nb <sub>1.35</sub> S <sub>2</sub>                | 0.5 M H <sub>2</sub> SO <sub>4</sub> | ~0.8                                             | Nat. Mater. 2019, 18, 1309                 |



|                                                        |                                      |       |                                    |
|--------------------------------------------------------|--------------------------------------|-------|------------------------------------|
| <b>PdCu-B2 NWs</b>                                     | 0.5 M H <sub>2</sub> SO <sub>4</sub> | 4.7   | ACS Energy Lett. 2020, 5, 3672     |
| <b>1% PtW<sub>6</sub>O<sub>24</sub>/C</b>              | 0.5 M H <sub>2</sub> SO <sub>4</sub> | 1.65  | Nat. Commun. 2020, 11, 490         |
| <b>W<sub>1</sub>Mo<sub>1</sub>-NG</b>                  | 0.5 M H <sub>2</sub> SO <sub>4</sub> | 1.78  | Sci. Adv. 2020, 6, eaba6586        |
| <b>Mo<sub>2</sub>-NG</b>                               |                                      | 1.50  |                                    |
| <b>W<sub>2</sub>-NG</b>                                |                                      | 0.33  |                                    |
| <b>NG</b>                                              |                                      | 0.67  |                                    |
| <b>Metallic-phase MoS<sub>2</sub></b>                  | 0.5 M H <sub>2</sub> SO <sub>4</sub> | 0.1   | Nat. Commun. 2016, 7, 10672        |
| <b>Pt<sub>3.21</sub>Ni@Ti<sub>3</sub>C<sub>2</sub></b> | 0.1 M KOH                            | 0.9   | Small 2019, 15, 1805474            |
| <b>Li<sub>x</sub>NiO/Ni</b>                            | 0.5 M H <sub>2</sub> SO <sub>4</sub> | 1.1   | J. Am. Chem. Soc. 2020, 142, 12613 |
| <b>a-Ni<sub>3</sub>S<sub>2</sub>@NPC</b>               | 0.5 M H <sub>2</sub> SO <sub>4</sub> | 0.492 | Nano Energy 2017, 36, 85–94        |
|                                                        | 1 M KOH                              | 0.786 |                                    |

|  |         |        |  |
|--|---------|--------|--|
|  | 2 M PBS | 0.0428 |  |
|--|---------|--------|--|

**Table S4. Comparison of the HER performance of Rh-SA/Ti<sub>3</sub>C<sub>2</sub>O<sub>x</sub> with previously electrocatalysts in alkaline conditions.**

| <i>Catalysts</i>                                      | <i>Electrolyte</i> | <i><math>\eta_{10}</math></i><br>(mV vs RHE) | <i>Tafel</i><br>(mV dec <sup>-1</sup> ) | <i>Stability</i> | <i>References</i>                         |
|-------------------------------------------------------|--------------------|----------------------------------------------|-----------------------------------------|------------------|-------------------------------------------|
| <b>Rh-SA/Ti<sub>3</sub>C<sub>2</sub>O<sub>x</sub></b> | 0.1 M KOH          | 29                                           | 47.6                                    | 24 h             | This work                                 |
| <b>B-CoP/CNT</b>                                      | 1 M KOH            | 56                                           | 69                                      | 100 h            | Angew. Chem. Int. Ed. 2020, 59, 4154      |
| <b>CoP/NPC/TF</b>                                     | 1 M KOH            | 80                                           | 50                                      | 10 h             | Adv. Energy Mater. 2019, 9, 1803970       |
| <b>Ce, N-CoP/CC</b>                                   | 1 M KOH            | 41                                           | 43                                      | 60 h             | Sustain. Energy Fuels, 2019, 3, 3344      |
| <b>CeO<sub>2</sub>/Co<sub>4</sub>N</b>                | 1 M KOH            | 30                                           | 66                                      | 15 h             | Appl. Catal. B-Environ. 2020, 277, 119282 |
| <b>Co@NG/NRGO</b>                                     | 1 M KOH            | 70                                           | 64                                      | 36 h             | Chem. Commun., 2020, 56, 567              |
| <b>Co<sub>0.31</sub>Mo<sub>1.69</sub>C/MXene/NC</b>   | 1 M KOH            | 75                                           | 43                                      | 100 h            | Adv. Energy Mater. 2019, 9, 1901333       |
| <b>N-Co-S/G</b>                                       | 1 M KOH            | 74.5                                         | 61.9                                    | 100 h            | Nano Energy 2021, 80, 105544              |
| <b>Co-P@PC-750</b>                                    | 1 M KOH            | 76                                           | 52                                      | 20 h             | Small 2020, 16, 1900550                   |
| <b>CoP-400</b>                                        | 1 M KOH            | 154                                          | 72                                      | 70,000 s         | Small 2018, 14, 1802824                   |

|                                                                          |         |      |       |        |                                            |
|--------------------------------------------------------------------------|---------|------|-------|--------|--------------------------------------------|
| <b>CoP/Ni<sub>2</sub>P@HPNCP</b>                                         | 1 M KOH | 121  | 61.89 | 20 h   | Nanoscale, 2020, 12, 23851                 |
| <b>CoS<sub>2</sub>@MoS<sub>2</sub>@CC-30h</b>                            | 1 M KOH | 87   | 87    | 20 h   | Adv. Mater. Interfaces 2020, 7, 2000780    |
| <b>Cu@WC</b>                                                             | 1 M KOH | 119  | 88.7  | 12 h   | Appl. Catal. B-Environ. 2021, 280, 119451  |
| <b>Cu<sub>3</sub>N-Cu<sub>3</sub>P/NPSCNWs@NF</b>                        | 1 M KOH | 68   | 69    | 24 h   | ChemElectroChem 2020, 7, 289               |
| <b>Cu<sub>0.075</sub>Co<sub>0.925</sub>P/CP</b>                          | 1 M KOH | 70   | 55.1  | 24 h   | J. Mater. Chem. A, 2019, 7, 14271          |
| <b>FeP/NCNSs</b>                                                         | 1 M KOH | 205  | 70    | 10 h   | ACS Sustainable Chem. Eng. 2018, 6, 11587  |
| <b>FeP/Ti</b>                                                            | 1 M KOH | 95   | 64    | -      | Appl. Catal. B-Environ. 2020 , 260, 118156 |
| <b>Fe<sub>0.43</sub>Co<sub>2.57</sub>(PO<sub>4</sub>)<sub>2</sub>/Cu</b> | 1 M KOH | 48.9 | 30.3  | 100 h  | ACS Sustainable Chem. Eng. 2020, 8, 13793  |
| <b>CoP/CC</b>                                                            | 1 M KOH | 209  | 129   | 22.5 h | J. Am. Chem. Soc. 2014, 136, 7587          |
| <b>CoP-CC</b>                                                            | 1 M KOH | 95   | 60    | 72 h   | ChemSusChem 2016, 9, 472                   |
| <b>CoFeP/Ti</b>                                                          | 1 M KOH | 78   | 75    | 20 h   | Adv. Mater. 2017, 29, 1602441              |

|                                                        |           |      |       |                 |                                     |
|--------------------------------------------------------|-----------|------|-------|-----------------|-------------------------------------|
| <b>CoFePO/NF</b>                                       | 1 M KOH   | 87.5 | 38.1  | 100 h           | ACS Nano 2016, 10, 8738             |
| <b>Co-P/NC</b>                                         | 1 M KOH   | 150  | 51    | 24 h            | Chem. Mater. 2015, 27, 7636         |
| <b>Co<sub>2</sub>P/NF</b>                              | 1 M KOH   | 108  | 69    | 10 h            | J. Mater. Chem. A 2017, 5, 16580    |
| <b>Co<sub>2</sub>P@N,P-PCN/CNTs</b>                    | 1 M KOH   | 154  | 52    | 25 h            | J. Mater. Chem. A 2016, 4, 15501    |
| <b>CoMoP@C/GC</b>                                      | 1 M KOH   | 81   | 55.5  | 24 h            | Energy Environ. Sci. 2017, 10, 788  |
| <b>rGO-few layer FePS<sub>3</sub></b>                  | 0.5 M KOH | 192  | -     | 1,000 CV cycles | ACS Energy Lett. 2016, 1, 367       |
| <b>Ni<sub>3</sub>Se<sub>2</sub> nanoforest</b>         | 1 M KOH   | 203  | 79    | 200 h           | Nano Energy 2016, 24, 103           |
| <b>CoSe<sub>2</sub>/CC</b>                             | 1 M KOH   | 190  | 85    | 12 h            | Adv. Mater 2016, 28, 7527           |
| <b>Ni<sub>0.33</sub>Co<sub>0.67</sub>S<sub>2</sub></b> | 1 M KOH   | 88   | 118   | 20 h            | Adv. Energy Mater. 2015, 5, 1402031 |
| <b>NiMoN film</b>                                      | 1 M KOH   | 109  | 95    | 36 h            | Adv. Energy Mater. 2016, 6, 1600221 |
| <b>P-Fe<sub>3</sub>O<sub>4</sub>/IF</b>                | 1 M KOH   | 42   | 41.09 | 60 h            | Adv. Mater. 2019, 31, 1905107       |

|                                                       |         |     |       |                 |                                            |
|-------------------------------------------------------|---------|-----|-------|-----------------|--------------------------------------------|
| <b>Co<sub>6</sub>W<sub>6</sub>C@NC/CC</b>             | 1 M KOH | 59  | 45.39 | 50 h            | Small 2020, 16, 1907556                    |
| <b>Mo-WC@NCS</b>                                      | 1 M KOH | 179 | 81    | 12 h            | Nano Energy 2020, 74, 104850               |
| <b>CoP NW/Hb</b>                                      | 1 M KOH | 52  | 88    | 14 h            | Nano Res. 2017, 10, 1010                   |
| <b>NiCo<sub>2</sub>P<sub>x</sub>/CF</b>               | 1 M KOH | 58  | 34.3  | 30 h            | Adv. Mater. 2017, 29, 1605502              |
| <b>Co-Ni-P film</b>                                   | 1 M KOH | 103 | 33    | 10 h            | ACS Appl. Mater. Interfaces 2017, 9, 31887 |
| <b>Mo-Ni<sub>2</sub>P/NF</b>                          | 1 M KOH | 78  | 109   | 2,500 CV cycles | Nanoscale 2017, 9, 16674                   |
| <b>Mo<sub>2</sub>F<sub>x</sub>C<sub>1-x</sub>/rGO</b> | 1 M KOH | 138 | 50    | 48 h            | ACS Sustainable Chem. Eng. 2020, 8, 10284  |
| <b>Mo-Ni<sub>2</sub>P/NF</b>                          | 1 M KOH | 78  | 109   | 2,500 CV cycles | Nanoscale 2017, 9, 16674                   |
| <b>MoP/CNT-700</b>                                    | 1 M KOH | 86  | 73    | 40 h            | Adv. Funct. Mater. 2018, 28, 1706523       |

$\eta_{10}$  is the overpotential at the current density of  $-10 \text{ mA cm}^{-2}$  except those specified else.

All of the "--" means that no values were reported for the corresponding parameters in the corresponding references.

Table S5. Comparison of the HER performance of Rh-SA/Ti<sub>3</sub>C<sub>2</sub>O<sub>x</sub> with previously electrocatalysts in neutral conditions.

| <i>Catalysts</i>                                    | <i>Electrolyte</i> | <i><math>\eta_{10}</math></i><br>(mV vs RHE) | <i>Tafel</i><br>(mV dec <sup>-1</sup> ) | <i>Stability</i> | <i>References</i>                         |
|-----------------------------------------------------|--------------------|----------------------------------------------|-----------------------------------------|------------------|-------------------------------------------|
| Rh-SA/Ti <sub>3</sub> C <sub>2</sub> O <sub>x</sub> | 1 M PBS            | 85                                           | 77.4                                    | 24 h             | This work                                 |
| B-CoP/CNT                                           | 1 M PBS            | 79                                           | 80                                      | 100 h            | Angew. Chem. Int. Ed. 2020, 59, 4154      |
| Ce, N-CoP/CC                                        | 1 M PBS            | 72                                           | 56                                      | 60 h             | Sustain. Energy Fuels, 2019, 3, 3344      |
| CeO <sub>2</sub> /Co <sub>4</sub> N                 | 1 M PBS            | 75                                           | 112                                     | 40 h             | Appl. Catal. B-Environ. 2020, 277, 119282 |
| Co@NG/NRGO                                          | 1 M PBS            | 400                                          | 89                                      | 40 h             | Chem. Commun., 2020, 56, 567              |
| Co <sub>0.31</sub> Mo <sub>1.69</sub> C/MXene/NC    | 0.1 M PBS          | 126                                          | 46                                      | -                | Adv. Energy Mater. 2019, 9, 1901333       |
| Co-P@PC-750                                         | 1 M PBS            | 85                                           | 58                                      | 20 h             | Small 2020, 16, 1900550                   |
| CoP-400                                             | 1 M PBS            | 161                                          | 81                                      | 70,000 s         | Small 2018, 14, 1802824                   |
| CoP/Ni <sub>2</sub> P@HPNCP                         | 1 M PBS            | 141                                          | 85.92                                   | 20 h             | Nanoscale, 2020, 12, 23851                |

|                                                                          |         |      |       |                 |                                           |
|--------------------------------------------------------------------------|---------|------|-------|-----------------|-------------------------------------------|
| <b>Cu@WC</b>                                                             | 1 M PBS | 173  | 118.3 | 12 h            | Appl. Catal. B-Environ. 2021, 280, 119451 |
| <b>Cu<sub>3</sub>N-Cu<sub>3</sub>P/NPSCNWs@NF</b>                        | 1 M PBS | 109  | 124.1 | 30 h            | ChemElectroChem 2020, 7, 289              |
| <b>Cu<sub>0.075</sub>Co<sub>0.925</sub>P/CP</b>                          | 1 M PBS | 120  | 97.5  | 24 h            | J. Mater. Chem. A, 2019, 7, 14271         |
| <b>FeP/NCNSs</b>                                                         | 1 M PBS | 409  | 92    | 10 h            | ACS Sustainable Chem. Eng. 2018, 6, 11587 |
| <b>Fe<sub>0.43</sub>Co<sub>2.57</sub>(PO<sub>4</sub>)<sub>2</sub>/Cu</b> | 1 M PBS | 53.8 | 91.5  | 100 h           | ACS Sustainable Chem. Eng. 2020, 8, 13793 |
| <b>CoP/CC</b>                                                            | 1 M PBS | 106  | 93    | 1,000 CV cycles | J. Am. Chem. Soc. 2014, 136, 7587         |
| <b>FeP/Ti</b>                                                            | 1 M PBS | 102  | -     | 16 h            | ACS Nano 2014, 8, 11101                   |
| <b>Fe-O-P NRs</b>                                                        | 1 M PBS | 96   | 47    | 60 h            | J. Mater. Chem. A 2018, 6, 9467           |
| <b>Mo-WC@NCS</b>                                                         | 1 M PBS | 221  | 95    | 12 h            | Nano Energy 2020, 74, 104850              |
| <b>CoP NW/Hb</b>                                                         | 1 M PBS | 120  | 106   | 100 h           | Nano Res. 2017, 10, 1010                  |
| <b>Ni-C-N NSs</b>                                                        | 1 M PBS | 92.1 | 38    | 70 h            | J. Am. Chem. Soc. 2016, 138, 14546        |



|                                                       |         |     |       |                 |                                           |
|-------------------------------------------------------|---------|-----|-------|-----------------|-------------------------------------------|
| <b>SiO<sub>2</sub>/PPy NTs-CFs</b>                    | 1 M PBS | 187 | 100.2 | 30 h            | Angew. Chem. Int. Ed. 2017, 56, 8120      |
| <b>NiCo<sub>2</sub>P<sub>x</sub>/CF</b>               | 1 M PBS | 63  | 63.3  | 30 h            | Adv. Mater. 2017, 29, 1605502             |
| <b>Co-S/FTO</b>                                       | 1 M PBS | 160 | 93    | 40 h            | J. Am. Chem. Soc. 2013, 135, 17699        |
| <b>NiWS<sub>x</sub>/FTO</b>                           | 1 M PBS | 373 | 96    | -               | Energy Environ. Sci. 2013, 6, 2452        |
| <b>CoW<sub>x</sub>/FTO</b>                            |         | 271 | 78    | -               |                                           |
| <b>CoMoS<sub>x</sub>/FTO</b>                          |         | 241 | 85    | -               |                                           |
| <b>CoMoS<sub>4</sub> NTA/CC</b>                       | 1 M PBS | 104 | 77    | 32 h            | Chem.-Eur. J. 2017, 23, 12718             |
| <b>Mo<sub>2</sub>F<sub>x</sub>C<sub>1-x</sub>/rGO</b> | 1 M PBS | 410 | 70    | 48 h            | ACS Sustainable Chem. Eng. 2020, 8, 10284 |
| <b>Mo-Ni<sub>2</sub>P/NF</b>                          | 1 M PBS | 84  | 85    | 2,500 CV cycles | Nanoscale 2017, 9, 16674                  |
| <b>MoP/CNT-700</b>                                    | 1 M PBS | 102 | 115   | 40 h            | Adv. Funct. Mater. 2018, 28, 1706523      |

$\eta_{10}$  is the overpotential at the current density of  $-10 \text{ mA cm}^{-2}$  except those specified else.

All of the "-" means that no values were reported for the corresponding parameters in the corresponding references.

Table S6. Comparison of HzOR performance in the alkaline media for Rh-SA/Ti<sub>3</sub>C<sub>2</sub>O<sub>x</sub> with other previously reported electrocatalysts.

| Catalysts                                           | Electrolyte                                      | Potential (mV vs RHE) | References                                  |
|-----------------------------------------------------|--------------------------------------------------|-----------------------|---------------------------------------------|
| Rh-SA/Ti <sub>3</sub> C <sub>2</sub> O <sub>x</sub> | 1.0 M KOH + 0.1 M N <sub>2</sub> H <sub>4</sub>  | $E_{37.5} = 100$      | <i>This work</i>                            |
|                                                     |                                                  | $E_{123.1} = 200$     |                                             |
|                                                     |                                                  | $E_{221.4} = 300$     |                                             |
| Mn-SA/BNC                                           | 1.0 M KOH + 0.5 M N <sub>2</sub> H <sub>4</sub>  | $E_{10} = 132$        | Nanoscale 2021, DOI: 10.1039/D0NR09104A     |
| PW-Co <sub>3</sub> N NWA/NF                         | 1.0 M KOH + 0.1 M N <sub>2</sub> H <sub>4</sub>  | $E_{10} = -55$        | Nat. Commun. 2020, 11, 1853                 |
|                                                     |                                                  | $E_{50} = -29$        |                                             |
|                                                     |                                                  | $E_{200} = 27$        |                                             |
| Co <sub>3</sub> Ta/C                                | 3.0 M KOH + 0.5 M N <sub>2</sub> H <sub>4</sub>  | $E_{25.2} = 60$       | Nat. Commun. 2019, 10, 4514                 |
| Ni <sub>x</sub> P/Ni foam                           | 1.0 M KOH + 1 M N <sub>2</sub> H <sub>4</sub>    | $E_{172} = 100$       | Appl. Catal. B: Environ. 2019, 241, 292     |
| Rh/N-CBs                                            | 1.0 M KOH + 0.05 M N <sub>2</sub> H <sub>4</sub> | $E_{10} = 72$         | ACS Appl. Mater. Interfaces 2019, 11, 35039 |

|                                       |                                                  |                      |                                       |
|---------------------------------------|--------------------------------------------------|----------------------|---------------------------------------|
| <b>Ni<sub>3</sub>S<sub>2</sub>/NF</b> | 1.0 M KOH + 0.2 M N <sub>2</sub> H <sub>4</sub>  | $E_{100} = 415$      | J. Mater. Chem. A 2018, 6, 19201      |
| <b>Ni<sub>2</sub>P/Ni foam</b>        | 1.0 M KOH + 0.5 M N <sub>2</sub> H <sub>4</sub>  | $E_{50} = -25$       | Angew. Chem. Int. Ed. 2017, 56, 842   |
| <b>Ni-NSA</b>                         | 3.0 M KOH + 1 M N <sub>2</sub> H <sub>4</sub>    | $E_{227.6} = 250$    | Angew. Chem. Int. Ed. 2016, 55, 693   |
| <b>NiZn</b>                           | 1.0 M KOH + 1 M N <sub>2</sub> H <sub>4</sub>    | $E_{320} = 600$      | Angew. Chem. Int. Ed. 2014, 53, 10336 |
| <b>Ni<sub>2</sub>P-HNTs/NF</b>        | 1.0 M KOH + 0.5 M N <sub>2</sub> H <sub>4</sub>  | $E_{100} = 166$      | Nanoscale 2020, 12, 11526             |
| <b>Cu<sub>1</sub>Ni<sub>2</sub>-N</b> | 1.0 M KOH + 0.5 M N <sub>2</sub> H <sub>4</sub>  | $E_{100} = \sim 200$ | Adv. Energy Mater. 2019, 9, 1900390   |
| <b>S-CuNiCo LDH-3</b>                 | 1.0 M KOH + 0.02 M N <sub>2</sub> H <sub>4</sub> | $E_{100} = \sim 700$ | J. Mater. Chem. A 2019, 7, 24437      |
| <b>Se/porous carbon membranes</b>     | 1.0 M KOH + 0.1 M N <sub>2</sub> H <sub>4</sub>  | $E_{10} = \sim 450$  | Angew. Chem. Int. Ed. 2019, 58, 13466 |
| <b>Fe<sub>2</sub>MoC@NC</b>           | 1.0 M KOH + 0.1 M N <sub>2</sub> H <sub>4</sub>  | $E_{10} = \sim 500$  | Angew. Chem. Int. Ed. 2018, 57, 17168 |
| <b>CoSe<sub>2</sub>/NF</b>            | 1.0 M KOH + 0.5 M N <sub>2</sub> H <sub>4</sub>  | $E_{100} = -17$      | Angew. Chem. Int. Ed. 2018, 57, 7649  |
| <b>NiO<sub>x</sub>-Pt/C</b>           | 1.0 M KOH + 0.1 M N <sub>2</sub> H <sub>4</sub>  | $E_{100} = \sim 200$ | Appl. Catal. B-Environ. 2017, 201, 22 |
| <b>N-doped carbon</b>                 | 1.0 M KOH + 0.1 M N <sub>2</sub> H <sub>4</sub>  | $E_{10} = \sim 700$  | Angew. Chem. Int. Ed. 2017, 56, 13513 |

|                                              |                                                  |                                   |                                   |
|----------------------------------------------|--------------------------------------------------|-----------------------------------|-----------------------------------|
| <b>CoNi alloy@CoNi sulfide</b>               | 1.0 M KOH + 2.0 M N <sub>2</sub> H <sub>4</sub>  | $E_{10} = \sim 150$               | Adv. Mater. 2017, 29, 1604080     |
| <b>Vertical graphene nano-hills-45</b>       | 1.0 M KOH + 0.05 M N <sub>2</sub> H <sub>4</sub> | $E_{10} = \sim 910$               | NPG Asia Mater. 2017, 9, e378.    |
| <b>FePc</b>                                  | 0.2 M KOH + (-) N <sub>2</sub> H <sub>4</sub>    | $E_{100} = \sim 0.35$             | Talanta 2005, 67, 162             |
| <b>Cu nanoparticles</b>                      | 0.1 M KOH + 0.01 M N <sub>2</sub> H <sub>4</sub> | $E_{100} = \sim 0.5$              | J. Mater. Chem. A 2014, 2, 4580   |
| <b>3D PNNF</b>                               | 3.0 M KOH + 0.5 M N <sub>2</sub> H <sub>4</sub>  | $E_{100} = \sim 0.125$            | Nano. Res. 2015, 8, 3365          |
| <b>FeN<sub>4</sub></b>                       | 0.2 M NaOH + (-)N <sub>2</sub> H <sub>4</sub>    | $E_{100} = \sim 0.4$              | Electrochem. Commun. 2013, 30, 34 |
| <b>Ni<sub>0.6</sub>Co<sub>0.4</sub>-ANSA</b> | 3.0 M KOH + 0.5 M N <sub>2</sub> H <sub>4</sub>  | $E_{100} = \sim -1$ (V vs SCE)    | Adv. Sci. 2017, 4, 1600179        |
| <b>Cu film</b>                               | 3.0 M KOH + 1.0 M N <sub>2</sub> H <sub>4</sub>  | $E_{100} = \sim -0.65$ (V vs SCE) | Adv. Mater. 2015, 27, 2361        |
| <b>Fe-CoS<sub>2</sub> nanosheets</b>         | 1.0 M KOH + 0.1 M N <sub>2</sub> H <sub>4</sub>  | $E_{100} = 0.129$                 | Nat. Commun. 2018, 9, 4365        |

$E_x$  is the potential at the current density of  $x \text{ mA cm}^{-2}$  except those specified else.

Table S7. Comparison of H<sub>2</sub> production rate obtained on the Rh-SA/Ti<sub>3</sub>C<sub>2</sub>O<sub>x</sub> with other previously reported electrocatalysts.

| <i>Catalysts</i>                                      | <i>Electrolyte</i>                              | <i>H<sub>2</sub> production rate</i> | <i>References</i>                     |
|-------------------------------------------------------|-------------------------------------------------|--------------------------------------|---------------------------------------|
| <b>Rh-SA/Ti<sub>3</sub>C<sub>2</sub>O<sub>x</sub></b> | 1 M KOH + 0.1 M N <sub>2</sub> H <sub>4</sub>   | 45.77 mmol h <sup>-1</sup>           | This work                             |
| <b>PW-Co<sub>3</sub>N NWA/NF</b>                      | 1 M KOH + 0.5 M N <sub>2</sub> H <sub>4</sub>   | 1.25 mmol h <sup>-1</sup>            | Nat. Commun. 2020, 11, 1853           |
| <b>Fe-CoS<sub>2</sub></b>                             | 1 M KOH + 5.3 M N <sub>2</sub> H <sub>4</sub>   | 9.95 mmol h <sup>-1</sup>            | Nat. Commun. 2018, 9, 4365            |
| <b>PPy/FeTCPP/Co</b>                                  | 1 M KOH                                         | 0.28 mmol h <sup>-1</sup>            | Adv. Funct. Mater. 2017, 27, 1606497  |
| <b>GO-PANi31-FP</b>                                   | 0.1 M KOH                                       | 0.496 μL s <sup>-1</sup>             | Angew. Chem. Int. Ed. 2016, 55, 13296 |
| <b>Fe<sub>0.5</sub>Ni<sub>0.5</sub>@N-GR</b>          | 1 M KOH                                         | 0.5 μL s <sup>-1</sup>               | Adv. Funct. Mater. 2018, 28, 1706928  |
| <b>WO<sub>3</sub>/BiVO<sub>4</sub></b>                | 0.5 M PBS + 1 M Na <sub>2</sub> SO <sub>3</sub> | 7.27 μL min <sup>-1</sup>            | Nano-Micro Lett. 2020, 12, 88         |
| <b>Ti-Fe<sub>2</sub>O<sub>3</sub></b>                 | 1 M NaOH                                        | 6.67 μL min <sup>-1</sup>            | ACS Nano 2018, 12, 8625               |
